# Supplementary material for: Single Strain High-Depth NGS Reveals High rDNA (ITS-LSU) Variability in the Four Prevalent Pathogenic Species of the Genus Candida
Source: Microorganisms. 2021 Feb 2;9(2):302. doi: 10.3390/microorganisms9020302 (PMC7912828; doi:10.3390/microorganisms9020302)
Supplement: Supplementary file 1 [file microorganisms-09-00302-s001.xlsx]

## Sheet: Table S1
	Table S1.	Strains employed in the study.
	GenBank Accession numbers	Strain	Species	MALDI-TOF					Biofilm	Ward of isolation	City
				Score 1		Score 2		Δ
1	MG367471	CMC 1730	C. albicans	C. albicans	2.09	C. albicans	1.456	0.634	BF	SM	P
2	MF767720	CMC 1965	C. albicans	C. albicans	1.958	C. albicans	1.521	0.437	BF	SM	P
3	MF767711	CMC 1966	C. albicans	C. albicans	1.832	C. africana	1.521	0.311	BF	SM	P
4	MG367472	CMC 1968	C. albicans	C. albicans	2.053	C. albicans	1.677	0.376	BF	SM	P
5	MF767810	CMC 1969	C. albicans	C. albicans	2.123	C. africana	1.575	0.548	BF	SM	P
6	MF767804	CMC 1970	C. albicans	C. albicans	2.079	C. albicans	1.52	0.559	BF	SM	P
7	MG367473	CMC 1971	C. albicans	C. albicans	2.088	C. albicans	1.65	0.438	BF	SM	P
8	MF767723	CMC 1974	C. albicans	C. albicans	2.007	C. africana	1.495	0.512	BF	SM	P
9	MF767724	CMC 1977	C. albicans	C. albicans	2.032	C. africana	1.609	0.423	BF	SM	P
10	MF767694	CMC 1980	C. albicans	C. albicans	2.186	C. africana	1.807	0.379	BF	S	P
11	MF767690	CMC 1982	C. albicans	C. albicans	2.057	C. africana	1.325	0.732	BF	SM	P
12	MF767703	CMC 1983	C. albicans	C. albicans	1.93	C. albicans	1.46	0.47	BF	ICU	P
13	MF767687	CMC 1985	C. albicans	C. albicans	2.017	C. africana	1.589	0.428	BF	SM	P
14	MF767777	CMC 1986	C. albicans	C. albicans	2.11	C. albicans	1.699	0.411	BF	ICU	P
15	MF767738	CMC 1987	C. albicans	C. albicans	2.175	C. africana	1.671	0.504	BF	S	P
16	MF767721	CMC 1990	C. albicans	C. albicans	2.217	C. africana	1.942	0.275	BF	ICU	P
17	MF767774	CMC 1991	C. albicans	C. albicans	2.218	C. africana	1.846	0.372	BF	S	P
18	MF767778	CMC 1992	C. albicans	C. albicans	2.214	C. africana	1.863	0.351	BF	ICU	P
19	MF767781	CMC 1994	C. albicans	C. albicans	2.109	C. africana	1.826	0.283	BF	SM	P
20	MG367474	CMC 1995	C. albicans	C. albicans	2.245	C. africana	1.937	0.308	BF	S	P
21	MF767698	CMC 1998	C. albicans	C. albicans	2.314	C. albicans	1.843	0.471	BF	ICU	P
22	MF767808	CMC 2000	C. albicans	C. albicans	2.187	C. albicans	1.876	0.311	BF	SM	P
23	MF767684	CMC 2001	C. albicans	C. albicans	2.256	C. africana	1.836	0.42	BF	SM	P
24	MF767693	CMC 2008	C. albicans	C. albicans	2.282	C. africana	1.98	0.302	BF	SM	P
25	MG367475	CMC 2010	C. albicans	C. albicans	2.207	C. albicans	1.867	0.34	BF	ICU	P
26	MF767716	CMC 2019	C. albicans	C. albicans	1.981	C. africana	1.749	0.232	BF	ICU	P
27	MF767792	CMC 2020	C. albicans	C. albicans	2.154	C. albicans	1.784	0.37	BF	S	P
28	MG367476	CMC 2021	C. albicans	C. albicans	2.172	C. africana	1.925	0.247	BF	ICU	P
29	MF767793	CMC 2023	C. albicans	C. albicans	2.255	C. albicans	1.9	0.355	BF	GM	P
30	MF767701	CMC 2025	C. albicans	C. albicans	2.226	C. albicans	1.884	0.342	BF	ICU	P
31	MF767766	CMC 2026	C. albicans	C. albicans	2.118	C. africana	1.804	0.314	BF	S	P
32	MF767762	CMC 2029	C. albicans	C. albicans	2.054	C. africana	1.748	0.306	BF	SM	P
33	MF767775	CMC 2030	C. albicans	C. albicans	2.172	C. albicans	1.783	0.389	BF	ICU	P
34	MF767702	CMC 2031	C. albicans	C. albicans	2.131	C. africana	1.726	0.405	BF	S	P
35	MF767833	CMC 2032	C. albicans	C. albicans	2.183	C. albicans	1.855	0.328	BF	S	P
36	MF767707	CMC 2033	C. albicans	C. albicans	2.179	C. africana	1.88	0.299	BF	S	P
37	MF767708	CMC 2034	C. albicans	C. albicans	2.199	C. albicans	1.783	0.416	BF	GM	P
38	MF767776	CMC 2035	C. albicans	C. albicans	2.295	C. africana	1.993	0.302	BF	SM	P
39	MF767760	CMC 2036	C. albicans	C. albicans	2.301	C. africana	1.976	0.325	BF	S	P
40	MF767713	CMC 2037	C. albicans	C. albicans	2.224	C. africana	1.353	0.871	BF	GM	P
41	MF767729	CMC 2042	C. albicans	C. albicans	2.182	C. africana	1.914	0.268	BF	ICU	P
42	MF767743	CMC 2043	C. albicans	C. albicans	2.28	C. africana	2.052	0.228	BF	GM	P
43	MF767784	CMC 2045	C. albicans	C. albicans	2.271	C. africana	1.942	0.329	BF	SM	P
44	MF767733	CMC 2046	C. albicans	C. albicans	2.28	C. africana	2.003	0.277	BF	ICU	P
45	MG367477	CMC 2047	C. albicans	C. albicans	2.18	C. africana	1.923	0.257	BF	SM	P
46	MF767683	CMC 2048	C. albicans	C. albicans	2.283	C. africana	1.878	0.405	BF	SM	P
47	MF767726	CMC 2049	C. albicans	C. albicans	2.252	C. africana	1.28	0.972	BF	S	P
48	MF767765	CMC 2053	C. albicans	C. albicans	2.16	C. africana	1.649	0.511	BF	SM	P
49	MF767788	CMC 1768	C. albicans	C. albicans	2.288	C. albicans	1.912	0.376	BF	S	U
50	MF767811	CMC 1769	C. albicans	C. albicans	2.219	C. africana	2.009	0.21	BF	GM	U
51	MF767741	CMC 1770	C. albicans	C. albicans	2.134	C. africana	1.941	0.193	BF	GM	U
52	MF767799	CMC 1771	C. albicans	C. albicans	2.284	C. africana	1.899	0.385	BF	GM	U
53	MF767751	CMC 1773	C. albicans	C. albicans	2.207	C. africana	1.95	0.257	BF	GM	U
54	MF767796	CMC 1774	C. albicans	C. albicans	2.134	C. africana	1.784	0.35	BF	ICU	U
55	MF767748	CMC 1776	C. albicans	C. albicans	2.181	C. albicans	1.869	0.312	BF	GM	U
56	MF767773	CMC 1778	C. albicans	C. albicans	2.051	C. albicans	1.646	0.405	BF	SM	U
57	MF767769	CMC 1780	C. albicans	C. albicans	2.085	C. africana	1.683	0.402	BF	GM	U
58	MF767807	CMC 1785	C. albicans	C. albicans	2.158	C. africana	1.957	0.201	BF	SM	U
59	MF767779	CMC 1786	C. albicans	C. albicans	2.189	C. albicans	1.768	0.421	BF	SM	U
60	MF767813	CMC 1788	C. albicans	C. albicans	2.011	C. albicans	1.683	0.328	NBF	S	U
61	MF767772	CMC 1790	C. albicans	C. albicans	2.193	C. albicans	1.891	0.302	BF	GM	U
62	MF767676	CMC 1794	C. albicans	C. albicans	2.178	C. africana	1.864	0.314	BF	S	U
63	MF767688	CMC 1795	C. albicans	C. albicans	2.067	C. africana	1.575	0.492	BF	GM	U
64	MF767677	CMC 1797	C. albicans	C. albicans	1.996	C. albicans	1.502	0.494	BF	O	U
65	MF767674	CMC 1799	C. albicans	C. albicans	2.247	C. africana	1.886	0.361	BF	ICU	U
66	MF767754	CMC 1802	C. albicans	C. albicans	1.996	C. africana	1.645	0.351	BF	ICU	U
67	MF767827	CMC 1803	C. albicans	C. albicans	2.191	C. africana	1.859	0.332	BF	ICU	U
68	MF767678	CMC 1804	C. albicans	C. albicans	2.032	C. africana	1.501	0.531	BF	S	U
69	MF767682	CMC 1806	C. albicans	C. albicans	2.243	C. africana	1.834	0.409	BF	S	U
70	MF767675	CMC 1811	C. albicans	C. albicans	2.264	C. africana	2.014	0.25	BF	GM	U
71	MF767829	CMC 1815	C. albicans	C. albicans	1.971	C. albicans	1.519	0.452	BF	GM	U
72	MF767695	CMC 1816	C. albicans	C. albicans	2.273	C. africana	1.914	0.359	BF	SM	U
73	MF767697	CMC 1818	C. albicans	C. albicans	2.228	C. africana	1.733	0.495	NBF	GM	U
74	MF767691	CMC 1819	C. albicans	C. albicans	2.091	C. albicans	1.786	0.305	BF	S	U
75	MF767719	CMC 1820	C. albicans	C. albicans	1.995	C. albicans	1.647	0.348	BF	SM	U
76	MF767704	CMC 1821	C. albicans	C. albicans	2.128	C. africana	1.977	0.151	BF	S	U
77	MF767752	CMC 1822	C. albicans	C. albicans	2.116	C. africana	1.868	0.248	BF	S	U
78	MF767680	CMC 1823	C. albicans	C. albicans	2	C. africana	1.663	0.337	BF	GM	U
79	MF767815	CMC 1824	C. albicans	C. albicans	2.217	C. africana	1.889	0.328	BF	S	U
80	MF767763	CMC 1828	C. albicans	C. albicans	2.289	C. albicans	1.943	0.346	BF	S	U
81	MF767736	CMC 1829	C. albicans	C. albicans	2.157	C. africana	2.041	0.116	BF	SM	U
82	MF767727	CMC 1831	C. albicans	C. albicans	2.216	C. albicans	1.867	0.349	BF	S	U
83	MF767820	CMC 1833	C. albicans	C. albicans	2.122	C. africana	1.852	0.27	BF	S	U
84	MF767806	CMC 1834	C. albicans	C. albicans	1.847	C. africana	1.617	0.23	BF	GM	U
85	MF767795	CMC 1835	C. albicans	C. albicans	2.074	C. africana	1.841	0.233	BF	SM	U
86	MF767800	CMC 1840	C. albicans	C. albicans	1.98	C. africana	1.825	0.155	BF	S	U
87	MF767755	CMC 1842	C. albicans	C. albicans	1.991	C. africana	1.803	0.188	BF	S	U
88	MF767746	CMC 1843	C. albicans	C. albicans	2.201	C. africana	1.988	0.213	BF	O	U
89	MF767679	CMC 1844	C. albicans	C. albicans	2.297	C. africana	2.011	0.286	BF	GM	U
90	MF767735	CMC 1845	C. albicans	C. albicans	2.149	C. africana	1.852	0.297	BF	GM	U
91	MF767787	CMC 1847	C. albicans	C. albicans	2.114	C. albicans	1.885	0.229	NBF	GM	U
92	MF767745	CMC 1848	C. albicans	C. albicans	2.228	C. africana	2.092	0.136	BF	SM	U
93	MF767744	CMC 1850	C. albicans	C. albicans	2.478	C. africana	2.055	0.423	BF	ICU	U
94	MF767805	CMC 1852	C. albicans	C. albicans	2.287	C. africana	2.076	0.211	BF	GM	U
95	MF767734	CMC 1853	C. albicans	C. albicans	2.328	C. africana	2.105	0.223	BF	GM	U
96	MF767771	CMC 1854	C. albicans	C. albicans	2.261	C. albicans	1.916	0.345	BF	SM	U
97	MF767700	CMC 1856	C. albicans	C. albicans	2.267	C. africana	1.847	0.42	BF	ICU	U
98	MF767731	CMC 1858	C. albicans	C. albicans	2.281	C. africana	2.039	0.242	BF	GM	U
99	MF767857	CMC 1860	C. albicans	C. glabrata	2.32	C. glabrata	1.727	0.593	BF	GM	U
100	MF767824	CMC 1862	C. albicans	C. albicans	2.232	C. africana	1.917	0.315	BF	GM	U
101	MF767794	CMC 1863	C. albicans	C. albicans	2.339	C. africana	1.996	0.343	BF	GM	U
102	MF767802	CMC 1866	C. albicans	C. albicans	2.368	C. africana	2.021	0.347	BF	S	U
103	MF767718	CMC 1868	C. albicans	C. albicans	2.366	C. albicans	1.949	0.417	BF	GM	U
104	MF767798	CMC 1869	C. albicans	C. albicans	2.242	C. africana	1.919	0.323	BF	SM	U
105	MF767750	CMC 1870	C. albicans	C. albicans	2.244	C. albicans	1.883	0.361	BF	SM	U
106	MF767706	CMC 1871	C. albicans	C. albicans	2.291	C. africana	1.924	0.367	NBF	SM	U
107	MF767789	CMC 1872	C. albicans	C. albicans	2.227	C. africana	1.959	0.268	BF	SM	U
108	MF767801	CMC 1873	C. albicans	C. albicans	2.306	C. albicans	2.02	0.286	BF	GM	U
109	MF767725	CMC 1875	C. albicans	C. albicans	2.261	C. africana	1.973	0.288	BF	GM	U
110	MF767689	CMC 1876	C. albicans	C. albicans	2.369	C. africana	1.978	0.391	BF	GM	U
111	MF767756	CMC 1877	C. albicans	C. albicans	2.33	C. albicans	1.901	0.429	BF	ICU	U
112	MF767714	CMC 1879	C. albicans	C. albicans	2.27	C. albicans	2.071	0.199	BF	GM	U
113	MF767715	CMC 1881	C. albicans	C. albicans	2.354	C. africana	2.013	0.341	BF	GM	U
114	MF767728	CMC 1885	C. albicans	C. albicans	2.297	C. africana	1.774	0.523	BF	S	U
115	MF767803	CMC 1886	C. albicans	C. albicans	2.32	C. africana	1.957	0.363	BF	GM	U
116	MF767797	CMC 1887	C. albicans	C. albicans	2.284	C. africana	2.161	0.123	BF	ICU	U
117	MF767828	CMC 1888	C. albicans	C. albicans	2.334	C. africana	1.983	0.351	BF	SM	U
118	MF767739	CMC 1889	C. albicans	C. albicans	2.319	C. africana	2.091	0.228	BF	GM	U
119	MF767826	CMC 1890	C. albicans	C. albicans	2.335	C. albicans	2.012	0.323	BF	GM	U
120	MF767764	CMC 1891	C. albicans	C. albicans	2.213	C. albicans	2.018	0.195	NBF	SM	U
121	MF767712	CMC 1893	C. albicans	C. albicans	2.277	C. albicans	1.975	0.302	BF	O	U
122	MF767710	CMC 1896	C. albicans	C. albicans	2.382	C. africana	2.047	0.335	BF	GM	U
123	MF767822	CMC 1898	C. albicans	C. albicans	2.362	C. albicans	2.02	0.342	NBF	GM	U
124	MF767717	CMC 1900	C. albicans	C. albicans	2.365	C. albicans	2.043	0.322	BF	GM	U
125	MF767757	CMC 1901	C. albicans	C. albicans	2.303	C. africana	1.981	0.322	BF	GM	U
126	MF767686	CMC 1903	C. albicans	C. albicans	2.408	C. albicans	1.994	0.414	BF	GM	U
127	MF767878	CMC 1904	C. albicans	C. tropicalis	2.333	C. frijolesensis	1.462	0.871	BF	SM	U
128	MF767782	CMC 1905	C. albicans	C. albicans	2.317	C. albicans	1.866	0.451	NBF	GM	U
129	MF767818	CMC 1906	C. albicans	C. albicans	2.218	C. africana	1.903	0.315	BF	GM	U
130	MF767681	CMC 1907	C. albicans	C. albicans	2.221	C. albicans	1.866	0.355	BF	GM	U
131	MF767641	CMC 1909	C. albicans	C. parapsilosis	2.197	A. libanotica	1.447	0.75	BF	SM	U
132	MF767740	CMC 1910	C. albicans	C. albicans	2.282	C. africana	1.793	0.489	BF	ICU	U
133	MF767809	CMC 1911	C. albicans	C. albicans	2.233	C. africana	2.031	0.202	BF	GM	U
134	MF767819	CMC 1913	C. albicans	C. albicans	2.328	C. africana	1.94	0.388	BF	GM	U
135	MF767816	CMC 1914	C. albicans	C. albicans	2.149	C. albicans	1.913	0.236	BF	S	U
136	MF767699	CMC 1915	C. albicans	C. albicans	2.184	C. africana	1.873	0.311	BF	SM	U
137	MF767749	CMC 1918	C. albicans	C. albicans	2.225	C. albicans	1.812	0.413	BF	R	U
138	MF767696	CMC 1919	C. albicans	C. albicans	2.226	C. africana	1.989	0.237	BF	GM	U
139	MF767814	CMC 1920	C. albicans	C. albicans	2.247	C. africana	1.94	0.307	BF	GM	U
140	MF767722	CMC 1921	C. albicans	C. albicans	2.247	C. africana	1.888	0.359	BF	GM	U
141	MF767705	CMC 1923	C. albicans	C. albicans	2.224	C. albicans	1.993	0.231	BF	GM	U
142	MF767790	CMC 1925	C. albicans	C. albicans	2.239	C. albicans	1.906	0.333	BF	SM	U
143	MF767821	CMC 1926	C. albicans	C. albicans	2.21	C. africana	1.948	0.262	BF	GM	U
144	MF767767	CMC 1927	C. albicans	C. albicans	2.116	C. africana	1.939	0.177	BF	S	U
145	MF767823	CMC 1928	C. albicans	C. albicans	2.274	C. africana	2.094	0.18	BF	SM	U
146	MF767742	CMC 1931	C. albicans	C. albicans	2.271	C. albicans	1.924	0.347	BF	S	U
147	MF767709	CMC 1932	C. albicans	C. albicans	2.215	C. africana	2.064	0.151	BF	GM	U
148	MF767692	CMC 1936	C. albicans	C. albicans	2.219	C. albicans	1.918	0.301	BF	SM	U
149	MF767758	CMC 1937	C. albicans	C. albicans	2.293	C. albicans	1.993	0.3	BF	GM	U
150	MF767783	CMC 1940	C. albicans	C. albicans	2.222	C. africana	1.936	0.286	BF	GM	U
151	MF767759	CMC 1941	C. albicans	C. albicans	2.262	C. albicans	1.916	0.346	BF	GM	U
152	MF767685	CMC 1942	C. albicans	C. albicans	2.334	C. africana	1.971	0.363	BF	S	U
153	MF767732	CMC 1946	C. albicans	C. albicans	2.276	C. albicans	1.976	0.3	NBF	SM	U
154	MF767791	CMC 1952	C. albicans	C. albicans	2.293	C. africana	1.913	0.38	BF	GM	U
155	MF767780	CMC 1954	C. albicans	C. albicans	2.202	C. albicans	1.833	0.369	NBF	S	U
156	MF767747	CMC 1957	C. albicans	C. albicans	2.115	C. albicans	1.831	0.284	BF	GM	U
157	MF767730	CMC 1958	C. albicans	C. albicans	2.323	C. albicans	2.017	0.306	BF	S	U
158	MF767753	CMC 1959	C. albicans	C. albicans	2.251	C. africana	1.915	0.336	BF	S	U
159	MF767768	CMC 1960	C. albicans	C. albicans	2.147	C. albicans	1.752	0.395	BF	GM	U
160	MF767812	CMC 1962	C. albicans	C. albicans	2.22	C. albicans	1.831	0.389	BF	GM	U
161	MF767737	CMC 1963	C. albicans	C. albicans	2.253	C. africana	1.852	0.401	NBF	R	U
162	MG367467	CMC 1726	C. glabrata	C. glabrata	2.214	C. glabrata	1.378	0.836	NBF	SM	P
163	MG367468	CMC 1727	C. glabrata	C. glabrata	2.321	C. glabrata	1.456	0.865	NBF	SM	P
164	MG367469	CMC 1731	C. glabrata	C. glabrata	2.199	C. glabrata	1.498	0.701	NBF	SM	P
165	MF767832	CMC 1976	C. glabrata	C. glabrata	1.935	C. glabrata	1.338	0.597	NBF	SM	P
166	MF767856	CMC 1989	C. glabrata	C. glabrata	2.356	C. glabrata	1.968	0.388	NBF	ICU	P
167	MF767834	CMC 2007	C. glabrata	C. glabrata	2.318	C. glabrata	1.773	0.545	NBF	SM	P
168	MF767859	CMC 2015	C. glabrata	C. glabrata	2.248	C. glabrata	1.841	0.407	NBF	GM	P
169	MF767831	CMC 2018	C. glabrata	C. glabrata	2.27	C. glabrata	1.757	0.513	NBF	ICU	P
170	MF767830	CMC 2027	C. glabrata	C. glabrata	2.375	C. glabrata	1.767	0.608	NBF	S	P
171	MF767671	CMC 1781	C. glabrata	C. glabrata	2.212	C. glabrata	1.987	0.225	NBF	O	U
172	MF767852	CMC 1782	C. glabrata	C. glabrata	2.24	A. histidinolovorans	1.469	0.771	NBF	ICU	U
173	MF767639	CMC 1796	C. glabrata	C. glabrata	2.238	C. glabrata	1.934	0.304	NBF	SM	U
174	MF767835	CMC 1807	C. glabrata	C. glabrata	2.202	A. histidinolovorans	1.462	0.74	NBF	GM	U
175	MF767848	CMC 1813	C. glabrata	C. glabrata	2.35	A. histidinolovorans	1.294	1.056	NBF	GM	U
176	MF767851	CMC 1817	C. glabrata	C. glabrata	2.247	L. paracasei	1.465	0.782	NBF	GM	U
177	MF767838	CMC 1830	C. glabrata	C. glabrata	2.157	C. glabrata	1.849	0.308	NBF	S	U
178	MF767846	CMC 1837	C. glabrata	C. glabrata	2.342	C. glabrata	2	0.342	NBF	GM	U
179	MF767850	CMC 1846	C. glabrata	C. glabrata	2.33	C. glabrata	2.02	0.31	NBF	GM	U
180	MF767845	CMC 1857	C. glabrata	C. glabrata	2.389	C. glabrata	1.824	0.565	NBF	GM	U
181	MF767849	CMC 1861	C. glabrata	C. albicans	2.337	C. albicans	1.985	0.352	BF	GM	U
182	MF767853	CMC 1864	C. glabrata	C. glabrata	2.329	C. glabrata	1.984	0.345	NBF	ICU	U
183	MF767839	CMC 1865	C. glabrata	C. glabrata	2.26	C. glabrata	1.833	0.427	NBF	S	U
184	MF767841	CMC 1884	C. glabrata	C. glabrata	2.274	C. glabrata	1.805	0.469	NBF	GM	U
185	MF767844	CMC 1895	C. glabrata	C. glabrata	2.365	C. glabrata	1.96	0.405	NBF	S	U
186	MF767842	CMC 1912	C. glabrata	C. glabrata	2.251	C. glabrata	1.865	0.386	NBF	GM	U
187	MF767837	CMC 1916	C. glabrata	C. glabrata	2.346	C. glabrata	1.759	0.587	NBF	ICU	U
188	MF767847	CMC 1933	C. glabrata	C. glabrata	2.317	C. glabrata	1.86	0.457	NBF	GM	U
189	MF767836	CMC 1934	C. glabrata	C. glabrata	2.28	C. glabrata	1.445	0.835	NBF	S	U
190	MF767843	CMC 1938	C. glabrata	C. glabrata	2.26	C. glabrata	1.799	0.461	NBF	GM	U
191	MF767840	CMC 1950	C. glabrata	C. glabrata	2.269	C. glabrata	1.859	0.41	NBF	SM	U
192	MF767858	CMC 1964	C. glabrata	C. glabrata	2.267	C. glabrata	1.726	0.541	NBF	SM	U
193	MF767667	CMC 1972	C. parapsilosis	C. parapsilosis	2.17	C. orhtopsilosis	1.345	0.825	BF	SM	P
194	MF767650	CMC 1973	C. parapsilosis	C. parapsilosis	2.153	C. tropicalis	1.348	0.805	BF	S	P
195	MF767628	CMC 1979	C. parapsilosis	C. parapsilosis	2.189	S. marcescens	1.371	0.818	BF	ICU	P
196	MF767636	CMC 1981	C. parapsilosis	C. parapsilosis	2.231	T. laibachii	1.297	0.934	BF	SM	P
197	MF767634	CMC 2006	C. parapsilosis	C. parapsilosis	2.167	L. sphaericus	1.369	0.798	BF	ICU	P
198	MF767656	CMC 2012	C. parapsilosis	C. parapsilosis	2.137	C. albicans	1.35	0.787	NBF	ICU	P
199	MF767626	CMC 2013	C. parapsilosis	C. parapsilosis	2.149	P. fermentans	1.408	0.741	NBF	SM	P
200	MF767632	CMC 2014	C. parapsilosis	C. parapsilosis	2.197	B. thailandensis	1.541	0.656	NBF	SM	P
201	MF767637	CMC 2016	C. parapsilosis	C. parapsilosis	2.14	L. helveticus	1.372	0.768	BF	SM	P
202	MF767640	CMC 2022	C. parapsilosis	C. parapsilosis	2.234	A. libanotica	1.415	0.819	NBF	S	P
203	MF767662	CMC 2038	C. parapsilosis	C. parapsilosis	2.044	C. albicans	1.353	0.691	NBF	SM	P
204	MF767649	CMC 2039	C. parapsilosis	C. parapsilosis	2.145	L. paracasei	1.34	0.805	BF	S	P
205	MF767635	CMC 2040	C. parapsilosis	C. parapsilosis	2.198	L. gasseri	1.366	0.832	NBF	S	P
206	MF767627	CMC 2044	C. parapsilosis	C. parapsilosis	2.178	C. lusitaniae	1.515	0.663	BF	ICU	P
207	MF767644	CMC 1772	C. parapsilosis	C. parapsilosis	2.29	C. orhtopsilosis	1.305	0.985	NBF	SM	U
208	MF767633	CMC 1783	C. parapsilosis	C. parapsilosis	2.285	S. griseus	1.272	1.013	NBF	GM	U
209	MF767655	CMC 1787	C. parapsilosis	C. parapsilosis	2.225	F. flavense	1.265	0.96	NBF	GM	U
210	MF767625	CMC 1791	C. parapsilosis	C. parapsilosis	2.286	P. orientalis	1.292	0.994	NBF	GM	U
211	MF767630	CMC 1793	C. parapsilosis	C. parapsilosis	2.308	G. morbillorum	1.307	1.001	NBF	GM	U
212	MF767660	CMC 1800	C. parapsilosis	C. parapsilosis	2.096	L. ruminis	1.365	0.731	NBF	SM	U
213	MF767631	CMC 1801	C. parapsilosis	C. parapsilosis	2.16	L. helveticus	1.334	0.826	NBF	SM	U
214	MF767624	CMC 1805	C. parapsilosis	C. parapsilosis	2.311	A. libanotica	1.437	0.874	NBF	GM	U
215	MF767623	CMC 1809	C. parapsilosis	C. parapsilosis	2.237	P. thivervalensis	1.311	0.926	BF	GM	U
216	MF767629	CMC 1814	C. parapsilosis	C. parapsilosis	2.242	A. libanotica	1.313	0.929	NBF	O	U
217	MF767643	CMC 1838	C. parapsilosis	C. parapsilosis	2.271	Pseudomonas spp	1.305	0.966	NBF	GM	U
218	MF767642	CMC 1841	C. parapsilosis	C. parapsilosis	2.249	C. orhtopsilosis	1.449	0.8	BF	S	U
219	MF767638	CMC 1851	C. parapsilosis	C. parapsilosis	2.235	A. libanotica	1.273	0.962	NBF	SM	U
220	MF767648	CMC 1859	C. parapsilosis	C. parapsilosis	2.335	A. libanotica	1.531	0.804	BF	SM	U
221	MF767647	CMC 1867	C. parapsilosis	C. parapsilosis	2.277	A. libanotica	1.447	0.83	NBF	ICU	U
222	MF767666	CMC 1892	C. parapsilosis	C. parapsilosis	2.231	S. griseus	1.368	0.863	NBF	R	U
223	MF767672	CMC 1899	C. parapsilosis	C. parapsilosis	2.239	F. flavense	1.375	0.864	NBF	GM	U
224	MF767653	CMC 1902	C. parapsilosis	C. parapsilosis	2.11	L. ruminis	1.37	0.74	BF	GM	U
225	MF767669	CMC 1917	C. parapsilosis	C. parapsilosis	2.247	C. novyi	1.298	0.949	BF	GM	U
226	MF767661	CMC 1929	C. parapsilosis	C. parapsilosis	2.163	S. downei	1.489	0.674	NBF	ICU	U
227	MF767654	CMC 1930	C. parapsilosis	C. parapsilosis	2.275	S. simiae	1.341	0.934	NBF	SM	U
228	MF767658	CMC 1935	C. parapsilosis	C. parapsilosis	2.277	C. glabrata	1.49	0.787	BF	GM	U
229	MF767665	CMC 1939	C. parapsilosis	C. parapsilosis	2.192	C. lusitaniae	1.344	0.848	BF	S	U
230	MF767652	CMC 1945	C. parapsilosis	C. parapsilosis	2.085	S. albus	1.35	0.735	NBF	O	U
231	MF767663	CMC 1948	C. parapsilosis	C. parapsilosis	2.209	S. lutrae	1.421	0.788	BF	SM	U
232	MF767670	CMC 1949	C. parapsilosis	C. parapsilosis	1.902	P. viridiflava	1.469	0.433	BF	GM	U
233	MF767664	CMC 1951	C. parapsilosis	C. parapsilosis	2.156	L. elongisporus	1.338	0.818	BF	SM	U
234	MF767862	CMC 1978	C. tropicalis	C. tropicalis	2.031	S. avidinii	1.443	0.588	BF	SM	P
235	MF767864	CMC 2003	C. tropicalis	C. tropicalis	2.341	C. sojae	1.492	0.849	BF	SM	P
236	MF767863	CMC 2009	C. tropicalis	C. tropicalis	2.251	C. albicans	1.434	0.817	BF	SM	P
237	MF767869	CMC 2017	C. tropicalis	C. tropicalis	2.075	L. ingluviei	1.478	0.597	BF	SM	P
238	MF767861	CMC 2024	C. tropicalis	C. tropicalis	2.232	S. avidinii	1.442	0.79	BF	ICU	P
239	MF767860	CMC 2041	C. tropicalis	C. albicans	2.255	C. albicans	1.888	0.367	BF	GM	P
240	MF767875	CMC 2052	C. tropicalis	C. albicans	2.203	C. africana	1.884	0.319	BF	SM	P
241	MF767866	CMC 1784	C. tropicalis	C. tropicalis	2.277	C. albicans	1.457	0.82	NBF	O	U
242	MF767871	CMC 1798	C. tropicalis	C. tropicalis	2.156	C. sojae	1.463	0.693	BF	GM	U
243	MF767876	CMC 1810	C. tropicalis	C. tropicalis	2.251	S. badius	1.422	0.829	BF	O	U
244	MF767870	CMC 1827	C. tropicalis	C. tropicalis	2.287	L. gastricus	1.458	0.829	BF	GM	U
245	MF767868	CMC 1836	C. tropicalis	C. tropicalis	2.288	C. frijolesensis	1.413	0.875	NBF	GM	U
246	MF767873	CMC 1839	C. tropicalis	C. tropicalis	2.241	C. frijolesensis	1.389	0.852	BF	GM	U
247	MF767867	CMC 1855	C. tropicalis	C. tropicalis	2.122	C. albicans	1.431	0.691	BF	O	U
248	MF767874	CMC 1874	C. tropicalis	C. tropicalis	2.273	C. albicans	1.508	0.765	BF	GM	U
249	MG373784	CMC 1943	C. tropicalis	C. tropicalis	2.229	C. parapsilosis	1.339	0.89	NBF	GM	U
250	MF767877	CMC 1953	C. tropicalis	C. tropicalis	2.29	C. albicans	1.433	0.857	NBF	O	U
251	MF767872	CMC 1956	C. tropicalis	C. tropicalis	2.011	C. albicans	1.511	0.5	NBF	GM	U
252	MF767865	CMC 1961	C. tropicalis	C. tropicalis	2.221	F. villosus	1.409	0.812	NBF	GM	U

## Sheet: Table S2
	Table S2.	Internal Variability of C. albicans strains
			Frequency of Variants per site																																		Intra-genomic Variability
	City of Isolation	Strain Number	Frequency of Variants per site																			LSU D1-D2 position															ITS			LSU D1-D2
			42	106	131	153	169	197	200	218	219	221	258	259	269	270	293	411	423	428	474	587	624	628	630	631	632	634	651	818	836	842	855	860	863	865	n° of Variable Sites	FVS (ITS)	Max. Var. per Variable Site	n° of Variable Sites	FVS (LSU)	Max. Var. per Variable Site	AFVS (ITS)	AFVS (LSU)
1	P	CMC 2046																											0.111								0		0	1	0.111	0.111	0.282795	0.173611
2	U	CMC 1960																											0.119								0		0	1	0.119	0.119
3	U	CMC 1863																											0.113								0		0	1	0.113	0.113
4	U	CMC 1776																									0.33										0		0	1	0.33	0.33
5	P	CMC 2000																						0.115		0.112		0.103									0		0	3	0.11	0.115
6	P	CMC 2026																						0.156		0.144		0.145	0.154								0		0	4	0.14975	0.156
7	U	CMC 1858																						0.121		0.115		0.115	0.12								0		0	4	0.11775	0.121
8	P	CMC 2033			0.472																																1	0.472	0.472	0
9	P	CMC 1969			0.329																																1	0.329	0.329	0
10	P	CMC 1968													0.49																						1	0.49	0.49	0
11	U	CMC 1940																0.294																			1	0.294	0.294	0
12	U	CMC 1925			0.273																																1	0.273	0.273	0
13	U	CMC 1843																			0.399																1	0.399	0.399	0
14	U	CMC 1845													0.463																						1	0.463	0.463	0
15	U	CMC 1853			0.114																																1	0.114	0.114	0
16	U	CMC 1790		0.481																																	1	0.481	0.481	0
17	U	CMC 1875																	0.299																		1	0.299	0.299	0
18	U	CMC 1906																0.246																			1	0.246	0.246	0
19	U	CMC 1786																	0.292																		1	0.292	0.292	0
20	U	CMC 1847																0.426																			1	0.426	0.426	0
21	U	CMC 1889																0.35																			1	0.35	0.35	0
22	U	CMC 1885																	0.284																		1	0.284	0.284	0
23	U	CMC 1911																0.131																			1	0.131	0.131	0
24	U	CMC 1879		0.273																																	1	0.273	0.273	0
25	U	CMC 1890		0.175																																	1	0.175	0.175	0
26	U	CMC 1888	0.2																																		1	0.2	0.2	0
27	U	CMC 1903																	0.149																		1	0.149	0.149	0
28	U	CMC 1909			0.34																																1	0.34	0.34	0
29	U	CMC 1806																	0.492																		1	0.492	0.492	0
30	U	CMC 1824																	0.278											0.121							1	0.278	0.278	1	0.121	0.121
31	U	CMC 1904						0.143																		0.226		0.25			0.2	0.194			0.14	0.119	1	0.143	0.143	6	0.188167	0.25
32	P	CMC 2045			0.148													0.113																			2	0.1305	0.148	0
33	U	CMC 1910		0.463	0.436																																2	0.4495	0.463	0
34	U	CMC 1860		0.34	0.348																																2	0.344	0.348	0
35	U	CMC 1905		0.318	0.308																																2	0.313	0.318	0
36	U	CMC 1962			0.365													0.473																			2	0.419	0.473	0
37	U	CMC 1920		0.121	0.194																																2	0.1575	0.194	0
38	U	CMC 1802				0.125													0.264																		2	0.1945	0.264	0
39	U	CMC 1803							0.118					0.126									0.251	0.333	0.262	0.325		0.298	0.313								2	0.122	0.126	6	0.297	0.333
40	P	CMC 2023				0.16	0.111											0.139																			3	0.136667	0.16	0
41	P	CMC 1730			0.179													0.225		0.153																	3	0.185667	0.225	0
42	U	CMC 1898		0.493	0.47													0.326																			3	0.429667	0.493	0
43	U	CMC 1869		0.209	0.201				0.115													0.175	0.192	0.198	0.197	0.197		0.2	0.196		0.155	0.13	0.132				3	0.175	0.209	10	0.1772	0.2
44	U	CMC 1928								0.133	0.13	0.131							0.15																		4	0.136	0.15	0
45	U	CMC 1848							0.186					0.176	0.166	0.16	0.113					0.273	0.275	0.28	0.283	0.286		0.281	0.286		0.264	0.249	0.214	0.189	0.185	0.178	5	0.1602	0.186	13	0.249462	0.286

## Sheet: Table S3
	Table S3.	Internal Variability of C. glabrata strains
			Frequency of Variants per site																		Intra-genomic Variability
	City of Isolation	Strain Number	ITS position																	LSU D1-D2 position	ITS			LSU D1-D2
			39	75	104	166	297	352	355	356	358	470	482	483	485	535	574	751	761	797	n° of Variable Sites	FVS (ITS)	Max. Var. per Variable Site	n° of Variable Sites	FVS (LSU)	Max. Var. per Variable Site	AFVS (ITS)	AFVS (LSU)
1	P	CMC 1731	0.157	0.219																	2	0.188	0.219	0			0.321496	0.337
2	P	CMC 1976								0.373											1	0.373	0.373	0
3	P	CMC 2015								0.373	0.238						0.133				3	0.248	0.373	0
4	P	CMC 2027			0.651						0.344										2	0.4975	0.651	0
5	P	CMC 2018																0.268			1	0.268	0.268	0
6	P	CMC 1727									0.625	0.596	0.596	0.383	0.596	0.556	0.207				7	0.508429	0.625	0
7	P	CMC 2007															0.346		0.253		2	0.2995	0.346	0
8	P	CMC 1726																0.671			1	0.671	0.671	0
9	U	CMC 1864															0.135				1	0.135	0.135	0
10	U	CMC 1781																0.423			1	0.423	0.423	0
11	U	CMC 1813						0.194	0.201		0.212						0.159				4	0.1915	0.212	0
12	U	CMC 1895																0.436			1	0.436	0.436	0
13	U	CMC 1782	0.127															0.426			2	0.2765	0.426	0
14	U	CMC 1916																		0.343	0			1	0.343	0.343
15	U	CMC 1934																0.437		0.331	1	0.437	0.437	1	0.331	0.331
16	U	CMC 1837																0.319			1	0.319	0.319	0
17	U	CMC 1938																0.368			1	0.368	0.368	0
18	U	CMC 1950														0.143					1	0.143	0.143	0
19	U	CMC 1884										0.158								0.337	1	0.158	0.158	1	0.337	0.337
20	U	CMC 1796			0.136	0.194	0.174														3	0.168	0.194	0

## Sheet: Table S4
	Table S4.	Internal Variability of C. parapsilosis strains
			Frequency of Variants per site																							Intra-genomic Variability
	City of Isolation	Strain Number	ITS position																LSU D1-D2 position							ITS			LSU D1-D2
			10	11	157	161	163	164	193	194	195	198	210	225	241	300	420	464	678	700	714	716	717	719	727	n° of Variable Sites	FVS (ITS)	Max. Var. per Variable Site	n° of Variable Sites	FVS (LSU)	Max. Var. per Variable Site	AFVS (ITS)	AFVS (LSU)
1	P	CMC 1972													0.123					0.154	0.1	0.138	0.16	0.113	0.15	1	0.123	0.123	6	0.135833	0.16	0.175278	0.127395
2	P	CMC 2038							0.14	0.183	0.145		0.17	0.126												5	0.1528	0.183	0
3	P	CMC 2040				0.297	0.332	0.422									0.113	0.132								5	0.2592	0.422	0
4	P	CMC 2039							0.18		0.156	0.12														3	0.152	0.18	0
5	P	CMC 2012								0.175	0.131															2	0.153	0.175	0
6	U	CMC 1939													0.19					0.116		0.111				1	0.19	0.19	2	0.1135	0.116
7	U	CMC 1800																		0.136		0.131		0.15	0.11	0			4	0.13175	0.15
8	U	CMC 1949													0.158	0.12				0.193	0.142	0.177	0.152	0.159	0.149	2	0.139	0.158	6	0.162	0.193
9	U	CMC 1930																		0.1						0			1	0.1	0.1
10	U	CMC 1951	0.253	0.253																						2	0.253	0.253	0
11	U	CMC 1899			0.17										0.141				0.117	0.12	0.126	0.12	0.12	0.123	0.123	2	0.1555	0.17	7	0.121286	0.126

## Sheet: Table S5
	Table S5.	Internal Variability of C. tropicalis strains
			Frequency of Variants per site																					Intra-genomic Variability
	City of Isolation	Strain Number	ITS position																LSU D1-D2 position					ITS			LSU D1-D2
			2	3	4	5	6	7	11	12	16	21	268	290	300	301	387	424	677	680	683	686	703	n° of Variable Sites	FVS (ITS)	Max. Var. per Variable Site	n° of Variable Sites	FVS (LSU)	Max. Var. per Variable Site	AFVS (ITS)	AFVS (LSU)
1	P	CMC 2052										0.13		0.161	0.125	0.131		0.434	0.198	0.125	0.132	0.14	0.138	5	0.1962	0.434	5	0.1466	0.198	0.244705	0.12265
2	P	CMC 2024		0.154																				1	0.154	0.154	0
3	P	CMC 2041															0.193							1	0.193	0.193	0
4	P	CMC 2009			0.257																			1	0.257	0.257	0
5	P	CMC 2003	0.222			0.125	0.233											0.391						4	0.24275	0.391	0
6	P	CMC 1978			0.289												0.267	0.276						3	0.277333	0.289	0
7	P	CMC 2017					0.185										0.314	0.186						3	0.228333	0.314	0
8	U	CMC 1956						0.381																1	0.381	0.381	0
9	U	CMC 1784				0.122	0.42										0.171		0.13			0.102		3	0.237667	0.42	2	0.116	0.13
10	U	CMC 1836						0.313	0.338	0.319				0.101			0.232	0.224	0.119					6	0.2545	0.338	1	0.119	0.119
11	U	CMC 1855											0.198						0.102					1	0.198	0.198	1	0.102	0.102
12	U	CMC 1798																0.436						1	0.436	0.436	0
13	U	CMC 1839						0.344			0.113								0.104					2	0.2285	0.344	1	0.104	0.104
14	U	CMC 1961			0.188	0.15	0.139												0.138					3	0.159	0.188	1	0.138	0.138
15	U	CMC 1943						0.4						0.179	0.136	0.153	0.389	0.369	0.174	0.119	0.127	0.129	0.119	6	0.271	0.4	5	0.1336	0.174
16	U	CMC 1810															0.19	0.212	0.122					2	0.201	0.212	1	0.122	0.122

## Sheet: Table S6
		Table S6.	Internal variability of C. albicans species (SNP).
			ITS position					LSU D1-D2 position
	City of Isolation	Strain number	SNP 106	SNP 412	SNP 422	SNP 424	SNP 429	SNP 841	SNP 956
1	P	CMC 1730					1	1
2	P	CMC 1965					1	1
3	P	CMC 1966					1	1
4	P	CMC 1968						1
5	P	CMC 1970						1
6	P	CMC 1971					1
7	P	CMC 1977					1
8	P	CMC 1980					1
9	P	CMC 1983					1	1
10	P	CMC 1985			1		1
11	P	CMC 1986					1
12	P	CMC 1987		1
13	P	CMC 1990						1
14	P	CMC 1992					1
15	P	CMC 1994	1
16	P	CMC 1995					1	1
17	P	CMC 2000					1	1
18	P	CMC 2001	1
19	P	CMC 2008					1
20	P	CMC 2010				1	1
21	P	CMC 2020			1		1
22	P	CMC 2023	1				1	1
23	P	CMC 2030					1	1
24	P	CMC 2031					1	1
25	P	CMC 2032					1
26	P	CMC 2033					1	1
27	P	CMC 2034					1	1
28	P	CMC 2036						1
29	P	CMC 2037					1
30	P	CMC 2045		1
31	P	CMC 2046					1	1
32	P	CMC 2053						1
33	U	CMC 1768						1
34	U	CMC 1769					1
35	U	CMC 1770					1
36	U	CMC 1771						1
37	U	CMC 1773					1
38	U	CMC 1774						1
39	U	CMC 1776					1
40	U	CMC 1786						1
41	U	CMC 1788					1	1
42	U	CMC 1790						1
43	U	CMC 1794						1
44	U	CMC 1797					1
45	U	CMC 1799						1
46	U	CMC 1802				1
47	U	CMC 1803			1
48	U	CMC 1804							1
49	U	CMC 1816						1
50	U	CMC 1818						1
51	U	CMC 1819					1		1
52	U	CMC 1820					1
53	U	CMC 1824				1		1
54	U	CMC 1828					1
55	U	CMC 1829	1				1
56	U	CMC 1831					1
57	U	CMC 1833			1
58	U	CMC 1835					1
59	U	CMC 1840					1
60	U	CMC 1842					1
61	U	CMC 1843					1
62	U	CMC 1844					1
63	U	CMC 1845					1
64	U	CMC 1847					1
65	U	CMC 1848							1
66	U	CMC 1850	1					1
67	U	CMC 1854		1			1
68	U	CMC 1856					1
69	U	CMC 1858					1
70	U	CMC 1862						1
71	U	CMC 1863				1
72	U	CMC 1866					1		1
73	U	CMC 1868						1
74	U	CMC 1869						1
75	U	CMC 1870						1
76	U	CMC 1871					1
77	U	CMC 1872					1
78	U	CMC 1873			1
79	U	CMC 1875						1
80	U	CMC 1876						1
81	U	CMC 1877						1
82	U	CMC 1879	1				1	1
83	U	CMC 1881					1	1
84	U	CMC 1885				1		1
85	U	CMC 1886						1
86	U	CMC 1887				1
87	U	CMC 1888					1
88	U	CMC 1889						1
89	U	CMC 1890	1				1	1
90	U	CMC 1891				1
91	U	CMC 1896					1	1
92	U	CMC 1898						1
93	U	CMC 1900					1
94	U	CMC 1901	1
95	U	CMC 1903				1		1
96	U	CMC 1904						1
97	U	CMC 1906		1			1
98	U	CMC 1907	1				1	1
99	U	CMC 1911		1			1
100	U	CMC 1914					1	1
101	U	CMC 1915						1
102	U	CMC 1918			1
103	U	CMC 1919			1			1
104	U	CMC 1920	1					1
105	U	CMC 1921						1
106	U	CMC 1923					1	1
107	U	CMC 1926						1
108	U	CMC 1927					1
109	U	CMC 1928				1
110	U	CMC 1931		1			1
111	U	CMC 1932			1
112	U	CMC 1936						1
113	U	CMC 1937			1
114	U	CMC 1941				1
115	U	CMC 1942						1
116	U	CMC 1946					1
117	U	CMC 1952			1
118	U	CMC 1954						1
119	U	CMC 1957					1
120	U	CMC 1960			1
121	U	CMC 1963						1

## Sheet: Table S7
		Table S7.	Internal variability of C. glabrata species (SNP).
			ITS position										LSU D1-D2 position
	City of Isolation	Strain number	SNP 74	SNP 75	SNP 104	SNP 297	SNP 311	SNP 354	SNP 355	SNP 358	SNP 574	SNP 751	SNP 1315
1	P	CMC 1726					1
2	P	CMC 1727			1						1
3	P	CMC 1731								1	1
4	P	CMC 1976								1	1
5	P	CMC 2007	1		1		1				1
6	P	CMC 2015		1
7	P	CMC 2018				1	1					1
8	P	CMC 1989				1	1
9	P	CMC 2027				1							1
10	U	CMC 1781											1
11	U	CMC 1782			1							1
12	U	CMC 1796				1	1			1	1
13	U	CMC 1807			1
14	U	CMC 1813				1	1			1	1
15	U	CMC 1817			1
16	U	CMC 1830					1				1
17	U	CMC 1837			1							1
18	U	CMC 1846				1			1
19	U	CMC 1857			1
20	U	CMC 1861	1		1
21	U	CMC 1864				1	1			1	1
22	U	CMC 1865				1	1			1	1
23	U	CMC 1884				1			1
24	U	CMC 1895			1							1
25	U	CMC 1912				1		1	1
26	U	CMC 1916			1							1
27	U	CMC 1933					1
28	U	CMC 1934			1							1
29	U	CMC 1938					1
30	U	CMC 1950			1							1
31	U	CMC 1964				1	1			1	1

## Sheet: Table S8
		Table S8.	Internal variability of C. parapsilosis species (SNP).
			ITS position					LSU D1-D2 position
	City of Isolation	Strain number	SNP 5	SNP 10	SNP 11	SNP 16	SNP 101	SNP 934
1	P	CMC 1972		1		1
2	P	CMC 2038	1			1
3	P	CMC 2040					1
4	U	CMC 1772				1
5	U	CMC 1783				1
6	U	CMC 1800		1	1	1
7	U	CMC 1809						1
8	U	CMC 1814				1
9	U	CMC 1838	1
10	U	CMC 1851	1
11	U	CMC 1859	1
12	U	CMC 1867				1
13	U	CMC 1892	1
14	U	CMC 1902						1
15	U	CMC 1917	1
16	U	CMC 1930	1			1
17	U	CMC 1935						1
18	U	CMC 1939	1					1
19	U	CMC 1945	1
20	U	CMC 1948	1
21	U	CMC 1951	1

## Sheet: Table S9
		Table S9.	Internal variability of C. tropicalis species (SNP).
			ITS position													LSU D1-D2 position
	City of Isolation	Strain number	SNP 6	SNP 17	SNP 49	SNP 99	SNP 268	SNP 278	SNP 285	SNP 333	SNP 341	SNP 357	SNP 364	SNP 381	SNP 407	SNP 479	SNP 490	SNP 491	SNP 498	SNP 952	SNP 956	SNP 977
1	P	CMC 1978			1			1	1	1		1	1	1	1	1	1	1	1
2	P	CMC 2003			1			1	1	1		1	1	1	1	1	1	1	1
3	P	CMC 2009		1	1			1	1	1		1	1	1	1	1	1	1	1
4	P	CMC 2017			1			1	1	1		1	1	1	1	1	1	1	1
5	P	CMC 2024		1	1			1	1	1		1	1	1	1	1	1	1	1
6	P	CMC 2041			1			1	1	1		1	1	1	1	1	1	1	1
7	P	CMC 2052			1			1	1	1		1	1	1	1	1	1	1	1
8	U	CMC 1784		1	1			1	1	1		1	1	1	1	1	1	1	1
9	U	CMC 1798		1	1			1	1	1		1	1	1	1	1	1	1	1
10	U	CMC 1810		1	1			1	1	1		1	1	1	1	1	1	1	1
11	U	CMC 1827		1	1			1	1	1		1	1	1	1	1	1	1	1	1
12	U	CMC 1836			1			1	1	1		1	1	1	1	1	1	1	1	1
13	U	CMC 1839			1			1	1	1		1	1	1	1	1	1	1	1
14	U	CMC 1855		1	1	1	1	1	1	1	1	1	1	1	1	1	1	1	1			1
15	U	CMC 1874			1			1	1	1		1	1	1	1	1	1	1	1
16	U	CMC 1943	1		1			1	1	1		1	1	1	1	1	1	1	1	1	1
17	U	CMC 1953		1	1			1	1	1		1	1	1	1	1	1	1	1
18	U	CMC 1956			1			1	1	1		1	1	1	1	1	1	1	1
19	U	CMC 1961			1			1	1	1		1	1	1	1	1	1	1	1	1

## Sheet: Table S10
		Table S10.	Distance matrix of C. albicans species.
				1	2	3	4	5	6	7	8	9	10	11	12	13	14	15	16	17	18	19	20	21	22	23	24	25	26	27	28	29	30	31	32	33	34	35	36	37	38	39	40	41	42	43	44	45	46
		City of Isolation		P	P	P	P	P	P	P	P	P	P	P	P	P	P	P	P	P	P	P	P	P	P	P	P	P	P	P	P	P	P	P	P	P	P	P	P	P	P	P	P	P	P	P	P	P	P
	City of Isolation		AB032172_Candida_albicans_CBS_562_ITS_LSU	CMC 1730	CMC 1965	CMC 1966	CMC 1968	CMC 1969	CMC 1970	CMC 1971	CMC 1974	CMC 1977	CMC 1980	CMC 1982	CMC 1983	CMC 1985	CMC 1986	CMC 1987	CMC 1990	CMC 1991	CMC 1992	CMC 1994	CMC 1995	CMC 1998	CMC 2000	CMC 2001	CMC 2008	CMC 2010	CMC 2019	CMC 2020	CMC 2021	CMC 2023	CMC 2025	CMC 2026	CMC 2029	CMC 2030	CMC 2031	CMC 2032	CMC 2033	CMC 2034	CMC 2035	CMC 2036	CMC 2037	CMC 2042	CMC 2043	CMC 2045	CMC 2046	CMC 2047	CMC 2048
		AB032172_Candida_albicans_CBS_562_ITS_LSU	100	99.731	99.804	99.804	99.853	99.804	99.853	99.706	99.706	99.706	99.804	99.804	99.804	99.608	99.657	99.633	99.951	99.804	99.682	99.608	99.804	99.804	99.902	99.755	99.755	99.706	99.804	99.706	99.804	99.608	99.804	99.804	99.706	99.804	99.804	99.608	99.706	99.804	99.804	100	99.633	99.706	99.706	99.608	99.804	99.804	99.804
1	P	CMC 1730	99.731	100	99.804	99.804	99.706	99.608	99.706	99.706	99.633	99.706	99.731	99.608	99.804	99.608	99.706	99.559	99.78	99.608	99.804	99.461	99.804	99.608	99.829	99.584	99.682	99.633	99.608	99.633	99.608	99.657	99.608	99.608	99.633	99.804	99.804	99.731	99.755	99.804	99.608	99.731	99.755	99.633	99.633	99.535	99.804	99.608	99.608
2	P	CMC 1965	99.804	99.804	100	100	99.657	99.804	99.657	99.902	99.706	99.902	99.804	99.804	100	99.804	99.657	99.51	99.853	99.804	99.755	99.412	100	99.804	99.902	99.657	99.755	99.706	99.804	99.706	99.804	99.608	99.804	99.804	99.706	100	100	99.804	99.706	100	99.804	99.804	99.706	99.706	99.706	99.608	100	99.804	99.804
3	P	CMC 1966	99.804	99.804	100	100	99.657	99.804	99.657	99.902	99.706	99.902	99.804	99.804	100	99.804	99.657	99.51	99.853	99.804	99.755	99.412	100	99.804	99.902	99.657	99.755	99.706	99.804	99.706	99.804	99.608	99.804	99.804	99.706	100	100	99.804	99.706	100	99.804	99.804	99.706	99.706	99.706	99.608	100	99.804	99.804
4	P	CMC 1968	99.853	99.706	99.657	99.657	100	99.657	99.951	99.559	99.755	99.559	99.657	99.657	99.657	99.461	99.706	99.682	99.804	99.657	99.731	99.657	99.657	99.657	99.755	99.608	99.608	99.559	99.657	99.559	99.657	99.657	99.657	99.657	99.755	99.657	99.657	99.657	99.755	99.657	99.657	99.853	99.682	99.755	99.755	99.657	99.657	99.657	99.657
5	P	CMC 1969	99.804	99.608	99.804	99.804	99.657	100	99.657	99.902	99.902	99.902	99.804	100	99.804	99.804	99.559	99.706	99.755	100	99.657	99.608	99.804	100	99.706	99.755	99.755	99.706	100	99.706	100	99.412	100	100	99.902	99.804	99.804	99.804	99.51	99.804	100	99.804	99.706	99.902	99.902	99.804	99.804	100	100
6	P	CMC 1970	99.853	99.706	99.657	99.657	99.951	99.657	100	99.559	99.755	99.559	99.657	99.657	99.657	99.461	99.706	99.682	99.804	99.657	99.731	99.657	99.657	99.657	99.755	99.608	99.608	99.559	99.657	99.559	99.657	99.657	99.657	99.657	99.755	99.657	99.657	99.657	99.755	99.657	99.657	99.853	99.682	99.755	99.755	99.657	99.657	99.657	99.657
7	P	CMC 1971	99.706	99.706	99.902	99.902	99.559	99.902	99.559	100	99.804	100	99.902	99.902	99.902	99.902	99.657	99.608	99.755	99.902	99.755	99.51	99.902	99.902	99.804	99.755	99.853	99.804	99.902	99.804	99.902	99.51	99.902	99.902	99.804	99.902	99.902	99.902	99.608	99.902	99.902	99.706	99.804	99.804	99.804	99.706	99.902	99.902	99.902
8	P	CMC 1974	99.706	99.633	99.706	99.706	99.755	99.902	99.755	99.804	100	99.804	99.706	99.902	99.706	99.706	99.657	99.804	99.657	99.902	99.755	99.706	99.706	99.902	99.608	99.657	99.657	99.608	99.902	99.608	99.902	99.51	99.902	99.902	100	99.706	99.706	99.902	99.608	99.706	99.902	99.706	99.804	100	100	99.902	99.706	99.902	99.902
9	P	CMC 1977	99.706	99.706	99.902	99.902	99.559	99.902	99.559	100	99.804	100	99.902	99.902	99.902	99.902	99.657	99.608	99.755	99.902	99.755	99.51	99.902	99.902	99.804	99.755	99.853	99.804	99.902	99.804	99.902	99.51	99.902	99.902	99.804	99.902	99.902	99.902	99.608	99.902	99.902	99.706	99.804	99.804	99.804	99.706	99.902	99.902	99.902
10	P	CMC 1980	99.804	99.731	99.804	99.804	99.657	99.804	99.657	99.902	99.706	99.902	100	99.804	99.804	99.804	99.755	99.633	99.853	99.804	99.78	99.608	99.804	99.804	99.902	99.853	99.951	99.902	99.804	99.902	99.804	99.608	99.804	99.804	99.706	99.804	99.804	99.804	99.706	99.804	99.804	99.804	99.829	99.706	99.706	99.608	99.804	99.804	99.804
11	P	CMC 1982	99.804	99.608	99.804	99.804	99.657	100	99.657	99.902	99.902	99.902	99.804	100	99.804	99.804	99.559	99.706	99.755	100	99.657	99.608	99.804	100	99.706	99.755	99.755	99.706	100	99.706	100	99.412	100	100	99.902	99.804	99.804	99.804	99.51	99.804	100	99.804	99.706	99.902	99.902	99.804	99.804	100	100
12	P	CMC 1983	99.804	99.804	100	100	99.657	99.804	99.657	99.902	99.706	99.902	99.804	99.804	100	99.804	99.657	99.51	99.853	99.804	99.755	99.412	100	99.804	99.902	99.657	99.755	99.706	99.804	99.706	99.804	99.608	99.804	99.804	99.706	100	100	99.804	99.706	100	99.804	99.804	99.706	99.706	99.706	99.608	100	99.804	99.804
13	P	CMC 1985	99.608	99.608	99.804	99.804	99.461	99.804	99.461	99.902	99.706	99.902	99.804	99.804	99.804	100	99.559	99.51	99.657	99.804	99.657	99.412	99.804	99.804	99.706	99.657	99.755	99.706	99.804	99.902	99.804	99.412	99.804	99.804	99.706	99.804	99.804	99.804	99.51	99.804	99.804	99.608	99.706	99.706	99.706	99.608	99.804	99.804	99.804
14	P	CMC 1986	99.657	99.706	99.657	99.657	99.706	99.559	99.706	99.657	99.657	99.657	99.755	99.559	99.657	99.559	100	99.584	99.706	99.559	99.78	99.755	99.657	99.559	99.755	99.706	99.706	99.657	99.559	99.657	99.559	99.853	99.559	99.559	99.657	99.657	99.657	99.755	99.853	99.657	99.559	99.657	99.78	99.657	99.657	99.559	99.657	99.559	99.559
15	P	CMC 1987	99.633	99.559	99.51	99.51	99.682	99.706	99.682	99.608	99.804	99.608	99.633	99.706	99.51	99.51	99.584	100	99.584	99.706	99.682	99.633	99.51	99.706	99.535	99.584	99.584	99.535	99.706	99.535	99.706	99.437	99.706	99.706	99.804	99.51	99.51	99.706	99.535	99.51	99.706	99.633	99.731	99.804	99.804	99.902	99.51	99.706	99.706
16	P	CMC 1990	99.951	99.78	99.853	99.853	99.804	99.755	99.804	99.755	99.657	99.755	99.853	99.755	99.853	99.657	99.706	99.584	100	99.755	99.731	99.559	99.853	99.755	99.951	99.755	99.804	99.755	99.755	99.755	99.755	99.657	99.755	99.755	99.657	99.853	99.853	99.657	99.755	99.853	99.755	99.951	99.682	99.657	99.657	99.559	99.853	99.755	99.755
17	P	CMC 1991	99.804	99.608	99.804	99.804	99.657	100	99.657	99.902	99.902	99.902	99.804	100	99.804	99.804	99.559	99.706	99.755	100	99.657	99.608	99.804	100	99.706	99.755	99.755	99.706	100	99.706	100	99.412	100	100	99.902	99.804	99.804	99.804	99.51	99.804	100	99.804	99.706	99.902	99.902	99.804	99.804	100	100
18	P	CMC 1992	99.682	99.804	99.755	99.755	99.731	99.657	99.731	99.755	99.755	99.755	99.78	99.657	99.755	99.657	99.78	99.682	99.731	99.657	100	99.584	99.755	99.657	99.78	99.633	99.731	99.682	99.657	99.682	99.657	99.682	99.657	99.657	99.755	99.755	99.755	99.853	99.78	99.755	99.657	99.682	99.878	99.755	99.755	99.657	99.755	99.657	99.657
19	P	CMC 1994	99.608	99.461	99.412	99.412	99.657	99.608	99.657	99.51	99.706	99.51	99.608	99.608	99.412	99.412	99.755	99.633	99.559	99.608	99.584	100	99.412	99.608	99.51	99.755	99.559	99.51	99.608	99.51	99.608	99.804	99.608	99.608	99.706	99.412	99.412	99.608	99.706	99.412	99.608	99.608	99.633	99.706	99.706	99.608	99.412	99.608	99.608
20	P	CMC 1995	99.804	99.804	100	100	99.657	99.804	99.657	99.902	99.706	99.902	99.804	99.804	100	99.804	99.657	99.51	99.853	99.804	99.755	99.412	100	99.804	99.902	99.657	99.755	99.706	99.804	99.706	99.804	99.608	99.804	99.804	99.706	100	100	99.804	99.706	100	99.804	99.804	99.706	99.706	99.706	99.608	100	99.804	99.804
21	P	CMC 1998	99.804	99.608	99.804	99.804	99.657	100	99.657	99.902	99.902	99.902	99.804	100	99.804	99.804	99.559	99.706	99.755	100	99.657	99.608	99.804	100	99.706	99.755	99.755	99.706	100	99.706	100	99.412	100	100	99.902	99.804	99.804	99.804	99.51	99.804	100	99.804	99.706	99.902	99.902	99.804	99.804	100	100
22	P	CMC 2000	99.902	99.829	99.902	99.902	99.755	99.706	99.755	99.804	99.608	99.804	99.902	99.706	99.902	99.706	99.755	99.535	99.951	99.706	99.78	99.51	99.902	99.706	100	99.755	99.853	99.804	99.706	99.804	99.706	99.706	99.706	99.706	99.608	99.902	99.902	99.706	99.804	99.902	99.706	99.902	99.731	99.608	99.608	99.51	99.902	99.706	99.706
23	P	CMC 2001	99.755	99.584	99.657	99.657	99.608	99.755	99.608	99.755	99.657	99.755	99.853	99.755	99.657	99.657	99.706	99.584	99.755	99.755	99.633	99.755	99.657	99.755	99.755	100	99.804	99.755	99.755	99.755	99.755	99.657	99.755	99.755	99.657	99.657	99.657	99.657	99.657	99.657	99.755	99.755	99.682	99.657	99.657	99.559	99.657	99.755	99.755
24	P	CMC 2008	99.755	99.682	99.755	99.755	99.608	99.755	99.608	99.853	99.657	99.853	99.951	99.755	99.755	99.755	99.706	99.584	99.804	99.755	99.731	99.559	99.755	99.755	99.853	99.804	100	99.951	99.755	99.853	99.755	99.559	99.755	99.755	99.657	99.755	99.755	99.755	99.657	99.755	99.755	99.755	99.78	99.657	99.657	99.559	99.755	99.755	99.755
25	P	CMC 2010	99.706	99.633	99.706	99.706	99.559	99.706	99.559	99.804	99.608	99.804	99.902	99.706	99.706	99.706	99.657	99.535	99.755	99.706	99.682	99.51	99.706	99.706	99.804	99.755	99.951	100	99.706	99.804	99.706	99.51	99.706	99.706	99.608	99.706	99.706	99.706	99.608	99.706	99.706	99.706	99.731	99.608	99.608	99.51	99.706	99.706	99.706
26	P	CMC 2019	99.804	99.608	99.804	99.804	99.657	100	99.657	99.902	99.902	99.902	99.804	100	99.804	99.804	99.559	99.706	99.755	100	99.657	99.608	99.804	100	99.706	99.755	99.755	99.706	100	99.706	100	99.412	100	100	99.902	99.804	99.804	99.804	99.51	99.804	100	99.804	99.706	99.902	99.902	99.804	99.804	100	100
27	P	CMC 2020	99.706	99.633	99.706	99.706	99.559	99.706	99.559	99.804	99.608	99.804	99.902	99.706	99.706	99.902	99.657	99.535	99.755	99.706	99.682	99.51	99.706	99.706	99.804	99.755	99.853	99.804	99.706	100	99.706	99.51	99.706	99.706	99.608	99.706	99.706	99.706	99.608	99.706	99.706	99.706	99.731	99.608	99.608	99.51	99.706	99.706	99.706
28	P	CMC 2021	99.804	99.608	99.804	99.804	99.657	100	99.657	99.902	99.902	99.902	99.804	100	99.804	99.804	99.559	99.706	99.755	100	99.657	99.608	99.804	100	99.706	99.755	99.755	99.706	100	99.706	100	99.412	100	100	99.902	99.804	99.804	99.804	99.51	99.804	100	99.804	99.706	99.902	99.902	99.804	99.804	100	100
29	P	CMC 2023	99.608	99.657	99.608	99.608	99.657	99.412	99.657	99.51	99.51	99.51	99.608	99.412	99.608	99.412	99.853	99.437	99.657	99.412	99.682	99.804	99.608	99.412	99.706	99.657	99.559	99.51	99.412	99.51	99.412	100	99.412	99.412	99.51	99.608	99.608	99.608	99.902	99.608	99.412	99.608	99.633	99.51	99.51	99.412	99.608	99.412	99.412
30	P	CMC 2025	99.804	99.608	99.804	99.804	99.657	100	99.657	99.902	99.902	99.902	99.804	100	99.804	99.804	99.559	99.706	99.755	100	99.657	99.608	99.804	100	99.706	99.755	99.755	99.706	100	99.706	100	99.412	100	100	99.902	99.804	99.804	99.804	99.51	99.804	100	99.804	99.706	99.902	99.902	99.804	99.804	100	100
31	P	CMC 2026	99.804	99.608	99.804	99.804	99.657	100	99.657	99.902	99.902	99.902	99.804	100	99.804	99.804	99.559	99.706	99.755	100	99.657	99.608	99.804	100	99.706	99.755	99.755	99.706	100	99.706	100	99.412	100	100	99.902	99.804	99.804	99.804	99.51	99.804	100	99.804	99.706	99.902	99.902	99.804	99.804	100	100
32	P	CMC 2029	99.706	99.633	99.706	99.706	99.755	99.902	99.755	99.804	100	99.804	99.706	99.902	99.706	99.706	99.657	99.804	99.657	99.902	99.755	99.706	99.706	99.902	99.608	99.657	99.657	99.608	99.902	99.608	99.902	99.51	99.902	99.902	100	99.706	99.706	99.902	99.608	99.706	99.902	99.706	99.804	100	100	99.902	99.706	99.902	99.902
33	P	CMC 2030	99.804	99.804	100	100	99.657	99.804	99.657	99.902	99.706	99.902	99.804	99.804	100	99.804	99.657	99.51	99.853	99.804	99.755	99.412	100	99.804	99.902	99.657	99.755	99.706	99.804	99.706	99.804	99.608	99.804	99.804	99.706	100	100	99.804	99.706	100	99.804	99.804	99.706	99.706	99.706	99.608	100	99.804	99.804
34	P	CMC 2031	99.804	99.804	100	100	99.657	99.804	99.657	99.902	99.706	99.902	99.804	99.804	100	99.804	99.657	99.51	99.853	99.804	99.755	99.412	100	99.804	99.902	99.657	99.755	99.706	99.804	99.706	99.804	99.608	99.804	99.804	99.706	100	100	99.804	99.706	100	99.804	99.804	99.706	99.706	99.706	99.608	100	99.804	99.804
35	P	CMC 2032	99.608	99.731	99.804	99.804	99.657	99.804	99.657	99.902	99.902	99.902	99.804	99.804	99.804	99.804	99.755	99.706	99.657	99.804	99.853	99.608	99.804	99.804	99.706	99.657	99.755	99.706	99.804	99.706	99.804	99.608	99.804	99.804	99.902	99.804	99.804	100	99.706	99.804	99.804	99.608	99.902	99.902	99.902	99.804	99.804	99.804	99.804
36	P	CMC 2033	99.706	99.755	99.706	99.706	99.755	99.51	99.755	99.608	99.608	99.608	99.706	99.51	99.706	99.51	99.853	99.535	99.755	99.51	99.78	99.706	99.706	99.51	99.804	99.657	99.657	99.608	99.51	99.608	99.51	99.902	99.51	99.51	99.608	99.706	99.706	99.706	100	99.706	99.51	99.706	99.731	99.608	99.608	99.51	99.706	99.51	99.51
37	P	CMC 2034	99.804	99.804	100	100	99.657	99.804	99.657	99.902	99.706	99.902	99.804	99.804	100	99.804	99.657	99.51	99.853	99.804	99.755	99.412	100	99.804	99.902	99.657	99.755	99.706	99.804	99.706	99.804	99.608	99.804	99.804	99.706	100	100	99.804	99.706	100	99.804	99.804	99.706	99.706	99.706	99.608	100	99.804	99.804
38	P	CMC 2035	99.804	99.608	99.804	99.804	99.657	100	99.657	99.902	99.902	99.902	99.804	100	99.804	99.804	99.559	99.706	99.755	100	99.657	99.608	99.804	100	99.706	99.755	99.755	99.706	100	99.706	100	99.412	100	100	99.902	99.804	99.804	99.804	99.51	99.804	100	99.804	99.706	99.902	99.902	99.804	99.804	100	100
39	P	CMC 2036	100	99.731	99.804	99.804	99.853	99.804	99.853	99.706	99.706	99.706	99.804	99.804	99.804	99.608	99.657	99.633	99.951	99.804	99.682	99.608	99.804	99.804	99.902	99.755	99.755	99.706	99.804	99.706	99.804	99.608	99.804	99.804	99.706	99.804	99.804	99.608	99.706	99.804	99.804	100	99.633	99.706	99.706	99.608	99.804	99.804	99.804
40	P	CMC 2037	99.633	99.755	99.706	99.706	99.682	99.706	99.682	99.804	99.804	99.804	99.829	99.706	99.706	99.706	99.78	99.731	99.682	99.706	99.878	99.633	99.706	99.706	99.731	99.682	99.78	99.731	99.706	99.731	99.706	99.633	99.706	99.706	99.804	99.706	99.706	99.902	99.731	99.706	99.706	99.633	100	99.804	99.804	99.706	99.706	99.706	99.706
41	P	CMC 2042	99.706	99.633	99.706	99.706	99.755	99.902	99.755	99.804	100	99.804	99.706	99.902	99.706	99.706	99.657	99.804	99.657	99.902	99.755	99.706	99.706	99.902	99.608	99.657	99.657	99.608	99.902	99.608	99.902	99.51	99.902	99.902	100	99.706	99.706	99.902	99.608	99.706	99.902	99.706	99.804	100	100	99.902	99.706	99.902	99.902
42	P	CMC 2043	99.706	99.633	99.706	99.706	99.755	99.902	99.755	99.804	100	99.804	99.706	99.902	99.706	99.706	99.657	99.804	99.657	99.902	99.755	99.706	99.706	99.902	99.608	99.657	99.657	99.608	99.902	99.608	99.902	99.51	99.902	99.902	100	99.706	99.706	99.902	99.608	99.706	99.902	99.706	99.804	100	100	99.902	99.706	99.902	99.902
43	P	CMC 2045	99.608	99.535	99.608	99.608	99.657	99.804	99.657	99.706	99.902	99.706	99.608	99.804	99.608	99.608	99.559	99.902	99.559	99.804	99.657	99.608	99.608	99.804	99.51	99.559	99.559	99.51	99.804	99.51	99.804	99.412	99.804	99.804	99.902	99.608	99.608	99.804	99.51	99.608	99.804	99.608	99.706	99.902	99.902	100	99.608	99.804	99.804
44	P	CMC 2046	99.804	99.804	100	100	99.657	99.804	99.657	99.902	99.706	99.902	99.804	99.804	100	99.804	99.657	99.51	99.853	99.804	99.755	99.412	100	99.804	99.902	99.657	99.755	99.706	99.804	99.706	99.804	99.608	99.804	99.804	99.706	100	100	99.804	99.706	100	99.804	99.804	99.706	99.706	99.706	99.608	100	99.804	99.804
45	P	CMC 2047	99.804	99.608	99.804	99.804	99.657	100	99.657	99.902	99.902	99.902	99.804	100	99.804	99.804	99.559	99.706	99.755	100	99.657	99.608	99.804	100	99.706	99.755	99.755	99.706	100	99.706	100	99.412	100	100	99.902	99.804	99.804	99.804	99.51	99.804	100	99.804	99.706	99.902	99.902	99.804	99.804	100	100
46	P	CMC 2048	99.804	99.608	99.804	99.804	99.657	100	99.657	99.902	99.902	99.902	99.804	100	99.804	99.804	99.559	99.706	99.755	100	99.657	99.608	99.804	100	99.706	99.755	99.755	99.706	100	99.706	100	99.412	100	100	99.902	99.804	99.804	99.804	99.51	99.804	100	99.804	99.706	99.902	99.902	99.804	99.804	100	100
47	P	CMC 2049	99.804	99.608	99.804	99.804	99.657	100	99.657	99.902	99.902	99.902	99.804	100	99.804	99.804	99.559	99.706	99.755	100	99.657	99.608	99.804	100	99.706	99.755	99.755	99.706	100	99.706	100	99.412	100	100	99.902	99.804	99.804	99.804	99.51	99.804	100	99.804	99.706	99.902	99.902	99.804	99.804	100	100
48	P	CMC 2053	100	99.731	99.804	99.804	99.853	99.804	99.853	99.706	99.706	99.706	99.804	99.804	99.804	99.608	99.657	99.633	99.951	99.804	99.682	99.608	99.804	99.804	99.902	99.755	99.755	99.706	99.804	99.706	99.804	99.608	99.804	99.804	99.706	99.804	99.804	99.608	99.706	99.804	99.804	100	99.633	99.706	99.706	99.608	99.804	99.804	99.804
49	U	CMC 1768	99.804	99.804	100	100	99.657	99.804	99.657	99.902	99.706	99.902	99.804	99.804	100	99.804	99.657	99.51	99.853	99.804	99.755	99.412	100	99.804	99.902	99.657	99.755	99.706	99.804	99.706	99.804	99.608	99.804	99.804	99.706	100	100	99.804	99.706	100	99.804	99.804	99.706	99.706	99.706	99.608	100	99.804	99.804
50	U	CMC 1769	99.804	99.608	99.804	99.804	99.657	100	99.657	99.902	99.902	99.902	99.804	100	99.804	99.804	99.559	99.706	99.755	100	99.657	99.608	99.804	100	99.706	99.755	99.755	99.706	100	99.706	100	99.412	100	100	99.902	99.804	99.804	99.804	99.51	99.804	100	99.804	99.706	99.902	99.902	99.804	99.804	100	100
51	U	CMC 1770	99.804	99.608	99.804	99.804	99.657	100	99.657	99.902	99.902	99.902	99.804	100	99.804	99.804	99.559	99.706	99.755	100	99.657	99.608	99.804	100	99.706	99.755	99.755	99.706	100	99.706	100	99.412	100	100	99.902	99.804	99.804	99.804	99.51	99.804	100	99.804	99.706	99.902	99.902	99.804	99.804	100	100
52	U	CMC 1771	99.804	99.804	100	100	99.657	99.804	99.657	99.902	99.706	99.902	99.804	99.804	100	99.804	99.657	99.51	99.853	99.804	99.755	99.412	100	99.804	99.902	99.657	99.755	99.706	99.804	99.706	99.804	99.608	99.804	99.804	99.706	100	100	99.804	99.706	100	99.804	99.804	99.706	99.706	99.706	99.608	100	99.804	99.804
53	U	CMC 1773	99.877	99.682	99.755	99.755	99.731	99.853	99.731	99.755	99.755	99.755	99.779	99.853	99.755	99.657	99.584	99.682	99.828	99.853	99.682	99.584	99.755	99.853	99.779	99.73	99.73	99.681	99.853	99.681	99.853	99.486	99.853	99.853	99.755	99.755	99.755	99.657	99.584	99.755	99.853	99.877	99.682	99.755	99.755	99.657	99.755	99.853	99.853
54	U	CMC 1774	99.804	99.804	100	100	99.657	99.804	99.657	99.902	99.706	99.902	99.804	99.804	100	99.804	99.657	99.51	99.853	99.804	99.755	99.412	100	99.804	99.902	99.657	99.755	99.706	99.804	99.706	99.804	99.608	99.804	99.804	99.706	100	100	99.804	99.706	100	99.804	99.804	99.706	99.706	99.706	99.608	100	99.804	99.804
55	U	CMC 1776	99.853	99.706	99.657	99.657	99.902	99.755	99.902	99.657	99.853	99.657	99.755	99.755	99.657	99.559	99.755	99.78	99.804	99.755	99.78	99.755	99.657	99.755	99.755	99.706	99.706	99.657	99.755	99.657	99.755	99.657	99.755	99.755	99.853	99.657	99.657	99.755	99.755	99.657	99.755	99.853	99.78	99.853	99.853	99.755	99.657	99.755	99.755
56	U	CMC 1778	99.706	99.755	99.706	99.706	99.755	99.706	99.755	99.804	99.804	99.804	99.902	99.706	99.706	99.706	99.853	99.731	99.755	99.706	99.878	99.706	99.706	99.706	99.804	99.755	99.853	99.804	99.706	99.804	99.706	99.706	99.706	99.706	99.804	99.706	99.706	99.902	99.804	99.706	99.706	99.706	99.927	99.804	99.804	99.706	99.706	99.706	99.706
57	U	CMC 1780	99.755	99.682	99.755	99.755	99.608	99.755	99.608	99.853	99.657	99.853	99.951	99.755	99.755	99.853	99.706	99.584	99.804	99.755	99.731	99.559	99.755	99.755	99.853	99.804	99.902	99.853	99.755	99.951	99.755	99.559	99.755	99.755	99.657	99.755	99.755	99.755	99.657	99.755	99.755	99.755	99.78	99.657	99.657	99.559	99.755	99.755	99.755
58	U	CMC 1785	99.511	99.56	99.511	99.511	99.462	99.511	99.462	99.609	99.511	99.609	99.706	99.511	99.511	99.511	99.56	99.437	99.56	99.511	99.584	99.413	99.511	99.511	99.609	99.56	99.658	99.609	99.511	99.609	99.511	99.413	99.511	99.511	99.511	99.511	99.511	99.609	99.511	99.511	99.511	99.511	99.633	99.511	99.511	99.413	99.511	99.511	99.511
59	U	CMC 1786	99.902	99.829	99.902	99.902	99.755	99.706	99.755	99.804	99.608	99.804	99.902	99.706	99.902	99.706	99.755	99.535	99.951	99.706	99.78	99.51	99.902	99.706	100	99.755	99.853	99.804	99.706	99.804	99.706	99.706	99.706	99.706	99.608	99.902	99.902	99.706	99.804	99.902	99.706	99.902	99.731	99.608	99.608	99.51	99.902	99.706	99.706
60	U	CMC 1788	99.902	99.706	99.902	99.902	99.755	99.902	99.755	99.804	99.804	99.804	99.706	99.902	99.902	99.706	99.559	99.608	99.853	99.902	99.657	99.51	99.902	99.902	99.804	99.657	99.657	99.608	99.902	99.608	99.902	99.51	99.902	99.902	99.804	99.902	99.902	99.706	99.608	99.902	99.902	99.902	99.608	99.804	99.804	99.706	99.902	99.902	99.902
61	U	CMC 1790	99.706	99.755	99.706	99.706	99.755	99.51	99.755	99.608	99.608	99.608	99.706	99.51	99.706	99.51	99.853	99.535	99.755	99.51	99.78	99.706	99.706	99.51	99.804	99.657	99.657	99.608	99.51	99.608	99.51	99.902	99.51	99.51	99.608	99.706	99.706	99.706	99.902	99.706	99.51	99.706	99.731	99.608	99.608	99.51	99.706	99.51	99.51
62	U	CMC 1794	99.902	99.829	99.902	99.902	99.755	99.706	99.755	99.804	99.608	99.804	99.902	99.706	99.902	99.706	99.755	99.535	99.951	99.706	99.78	99.51	99.902	99.706	100	99.755	99.853	99.804	99.706	99.804	99.706	99.706	99.706	99.706	99.608	99.902	99.902	99.706	99.804	99.902	99.706	99.902	99.731	99.608	99.608	99.51	99.902	99.706	99.706
63	U	CMC 1795	99.804	99.706	99.902	99.902	99.657	99.902	99.657	99.902	99.804	99.902	99.804	99.902	99.902	99.804	99.608	99.608	99.804	99.902	99.706	99.51	99.902	99.902	99.804	99.706	99.755	99.706	99.902	99.706	99.902	99.51	99.902	99.902	99.804	99.902	99.902	99.804	99.608	99.902	99.902	99.804	99.706	99.804	99.804	99.706	99.902	99.902	99.902
64	U	CMC 1797	99.804	99.608	99.804	99.804	99.657	100	99.657	99.902	99.902	99.902	99.804	100	99.804	99.804	99.559	99.706	99.755	100	99.657	99.608	99.804	100	99.706	99.755	99.755	99.706	100	99.706	100	99.412	100	100	99.902	99.804	99.804	99.804	99.51	99.804	100	99.804	99.706	99.902	99.902	99.804	99.804	100	100
65	U	CMC 1799	99.706	99.755	99.706	99.706	99.755	99.51	99.755	99.608	99.608	99.608	99.706	99.51	99.706	99.51	99.853	99.535	99.755	99.51	99.78	99.706	99.706	99.51	99.804	99.657	99.657	99.608	99.51	99.608	99.51	99.902	99.51	99.51	99.608	99.706	99.706	99.706	99.902	99.706	99.51	99.706	99.731	99.608	99.608	99.51	99.706	99.51	99.51
66	U	CMC 1802	99.755	99.682	99.755	99.755	99.608	99.657	99.608	99.755	99.559	99.755	99.853	99.657	99.755	99.657	99.657	99.486	99.804	99.657	99.682	99.461	99.755	99.657	99.853	99.706	99.902	99.951	99.657	99.755	99.657	99.559	99.657	99.657	99.559	99.755	99.755	99.657	99.657	99.755	99.657	99.755	99.682	99.559	99.559	99.461	99.755	99.657	99.657
67	U	CMC 1803	99.706	99.633	99.706	99.706	99.559	99.706	99.559	99.804	99.608	99.804	99.902	99.706	99.706	99.902	99.657	99.535	99.755	99.706	99.682	99.51	99.706	99.706	99.804	99.755	99.853	99.804	99.706	100	99.706	99.51	99.706	99.706	99.608	99.706	99.706	99.706	99.608	99.706	99.706	99.706	99.731	99.608	99.608	99.51	99.706	99.706	99.706
68	U	CMC 1804	99.314	99.437	99.51	99.51	99.363	99.51	99.363	99.608	99.608	99.608	99.51	99.51	99.51	99.51	99.461	99.412	99.363	99.51	99.559	99.314	99.51	99.51	99.412	99.363	99.461	99.412	99.51	99.412	99.51	99.314	99.51	99.51	99.608	99.51	99.51	99.706	99.412	99.51	99.51	99.314	99.608	99.608	99.608	99.51	99.51	99.51	99.51
69	U	CMC 1806	99.706	99.633	99.706	99.706	99.559	99.706	99.559	99.804	99.608	99.804	99.902	99.706	99.706	99.804	99.657	99.535	99.755	99.706	99.682	99.51	99.706	99.706	99.804	99.755	99.902	99.902	99.706	99.902	99.706	99.51	99.706	99.706	99.608	99.706	99.706	99.706	99.608	99.706	99.706	99.706	99.731	99.608	99.608	99.51	99.706	99.706	99.706
70	U	CMC 1811	99.608	99.559	99.51	99.51	99.657	99.51	99.657	99.51	99.608	99.51	99.608	99.51	99.51	99.412	99.657	99.633	99.608	99.51	99.633	99.608	99.51	99.51	99.608	99.51	99.559	99.51	99.51	99.51	99.51	99.608	99.51	99.51	99.608	99.51	99.51	99.608	99.657	99.51	99.51	99.608	99.633	99.608	99.608	99.608	99.51	99.51	99.51
71	U	CMC 1815	99.755	99.682	99.755	99.755	99.608	99.657	99.608	99.755	99.559	99.755	99.853	99.657	99.755	99.657	99.657	99.486	99.804	99.657	99.682	99.461	99.755	99.657	99.853	99.706	99.804	99.755	99.657	99.755	99.657	99.559	99.657	99.657	99.559	99.755	99.755	99.657	99.657	99.755	99.657	99.755	99.682	99.559	99.559	99.461	99.755	99.657	99.657
72	U	CMC 1816	99.804	99.804	100	100	99.657	99.804	99.657	99.902	99.706	99.902	99.804	99.804	100	99.804	99.657	99.51	99.853	99.804	99.755	99.412	100	99.804	99.902	99.657	99.755	99.706	99.804	99.706	99.804	99.608	99.804	99.804	99.706	100	100	99.804	99.706	100	99.804	99.804	99.706	99.706	99.706	99.608	100	99.804	99.804
73	U	CMC 1818	99.804	99.804	100	100	99.657	99.804	99.657	99.902	99.706	99.902	99.804	99.804	100	99.804	99.657	99.51	99.853	99.804	99.755	99.412	100	99.804	99.902	99.657	99.755	99.706	99.804	99.706	99.804	99.608	99.804	99.804	99.706	100	100	99.804	99.706	100	99.804	99.804	99.706	99.706	99.706	99.608	100	99.804	99.804
74	U	CMC 1819	99.706	99.559	99.51	99.51	99.755	99.706	99.755	99.608	99.804	99.608	99.706	99.706	99.51	99.51	99.657	99.731	99.657	99.706	99.682	99.706	99.51	99.706	99.608	99.657	99.657	99.608	99.706	99.608	99.706	99.51	99.706	99.706	99.804	99.51	99.51	99.706	99.608	99.51	99.706	99.706	99.731	99.804	99.804	99.706	99.51	99.706	99.706
75	U	CMC 1820	99.706	99.633	99.706	99.706	99.755	99.902	99.755	99.804	100	99.804	99.706	99.902	99.706	99.706	99.657	99.804	99.657	99.902	99.755	99.706	99.706	99.902	99.608	99.657	99.657	99.608	99.902	99.608	99.902	99.51	99.902	99.902	100	99.706	99.706	99.902	99.608	99.706	99.902	99.706	99.804	100	100	99.902	99.706	99.902	99.902
76	U	CMC 1821	99.609	99.658	99.609	99.609	99.56	99.609	99.56	99.706	99.609	99.706	99.804	99.609	99.609	99.609	99.658	99.535	99.658	99.609	99.682	99.511	99.609	99.609	99.706	99.658	99.755	99.706	99.609	99.706	99.609	99.511	99.609	99.609	99.609	99.609	99.609	99.706	99.609	99.609	99.609	99.609	99.731	99.609	99.609	99.511	99.609	99.609	99.609
77	U	CMC 1822	99.706	99.706	99.902	99.902	99.559	99.902	99.559	100	99.804	100	99.902	99.902	99.902	99.902	99.657	99.608	99.755	99.902	99.755	99.51	99.902	99.902	99.804	99.755	99.853	99.804	99.902	99.804	99.902	99.51	99.902	99.902	99.804	99.902	99.902	99.902	99.608	99.902	99.902	99.706	99.804	99.804	99.804	99.706	99.902	99.902	99.902
78	U	CMC 1823	99.755	99.755	99.951	99.951	99.608	99.853	99.608	99.951	99.755	99.951	99.853	99.853	99.951	99.853	99.657	99.559	99.804	99.853	99.755	99.461	99.951	99.853	99.853	99.706	99.804	99.755	99.853	99.755	99.853	99.559	99.853	99.853	99.755	99.951	99.951	99.853	99.657	99.951	99.853	99.755	99.755	99.755	99.755	99.657	99.951	99.853	99.853
79	U	CMC 1824	99.706	99.633	99.706	99.706	99.559	99.706	99.559	99.804	99.608	99.804	99.902	99.706	99.706	99.706	99.657	99.535	99.755	99.706	99.682	99.51	99.706	99.706	99.804	99.755	99.951	100	99.706	99.804	99.706	99.51	99.706	99.706	99.608	99.706	99.706	99.706	99.608	99.706	99.706	99.706	99.731	99.608	99.608	99.51	99.706	99.706	99.706
80	U	CMC 1828	99.804	99.608	99.804	99.804	99.657	100	99.657	99.902	99.902	99.902	99.804	100	99.804	99.804	99.559	99.706	99.755	100	99.657	99.608	99.804	100	99.706	99.755	99.755	99.706	100	99.706	100	99.412	100	100	99.902	99.804	99.804	99.804	99.51	99.804	100	99.804	99.706	99.902	99.902	99.804	99.804	100	100
81	U	CMC 1829	99.608	99.461	99.412	99.412	99.657	99.608	99.657	99.51	99.706	99.51	99.608	99.608	99.412	99.412	99.755	99.633	99.559	99.608	99.584	100	99.412	99.608	99.51	99.755	99.559	99.51	99.608	99.51	99.608	99.804	99.608	99.608	99.706	99.412	99.412	99.608	99.706	99.412	99.608	99.608	99.633	99.706	99.706	99.608	99.412	99.608	99.608
82	U	CMC 1831	99.706	99.633	99.706	99.706	99.755	99.902	99.755	99.804	100	99.804	99.706	99.902	99.706	99.706	99.657	99.804	99.657	99.902	99.755	99.706	99.706	99.902	99.608	99.657	99.657	99.608	99.902	99.608	99.902	99.51	99.902	99.902	100	99.706	99.706	99.902	99.608	99.706	99.902	99.706	99.804	100	100	99.902	99.706	99.902	99.902
83	U	CMC 1833	99.608	99.608	99.804	99.804	99.461	99.804	99.461	99.902	99.706	99.902	99.804	99.804	99.804	100	99.559	99.51	99.657	99.804	99.657	99.412	99.804	99.804	99.706	99.657	99.755	99.706	99.804	99.902	99.804	99.412	99.804	99.804	99.706	99.804	99.804	99.804	99.51	99.804	99.804	99.608	99.706	99.706	99.706	99.608	99.804	99.804	99.804
84	U	CMC 1834	99.755	99.682	99.755	99.755	99.608	99.755	99.608	99.853	99.657	99.853	99.951	99.755	99.755	99.853	99.706	99.584	99.804	99.755	99.731	99.559	99.755	99.755	99.853	99.804	99.902	99.853	99.755	99.951	99.755	99.559	99.755	99.755	99.657	99.755	99.755	99.755	99.657	99.755	99.755	99.755	99.78	99.657	99.657	99.559	99.755	99.755	99.755
85	U	CMC 1835	99.804	99.608	99.804	99.804	99.657	100	99.657	99.902	99.902	99.902	99.804	100	99.804	99.804	99.559	99.706	99.755	100	99.657	99.608	99.804	100	99.706	99.755	99.755	99.706	100	99.706	100	99.412	100	100	99.902	99.804	99.804	99.804	99.51	99.804	100	99.804	99.706	99.902	99.902	99.804	99.804	100	100
86	U	CMC 1840	99.706	99.633	99.706	99.706	99.755	99.902	99.755	99.804	100	99.804	99.706	99.902	99.706	99.706	99.657	99.804	99.657	99.902	99.755	99.706	99.706	99.902	99.608	99.657	99.657	99.608	99.902	99.608	99.902	99.51	99.902	99.902	100	99.706	99.706	99.902	99.608	99.706	99.902	99.706	99.804	100	100	99.902	99.706	99.902	99.902
87	U	CMC 1842	99.804	99.608	99.804	99.804	99.657	100	99.657	99.902	99.902	99.902	99.804	100	99.804	99.804	99.559	99.706	99.755	100	99.657	99.608	99.804	100	99.706	99.755	99.755	99.706	100	99.706	100	99.412	100	100	99.902	99.804	99.804	99.804	99.51	99.804	100	99.804	99.706	99.902	99.902	99.804	99.804	100	100
88	U	CMC 1843	99.657	99.584	99.657	99.657	99.608	99.853	99.608	99.755	99.853	99.755	99.657	99.853	99.657	99.657	99.51	99.657	99.608	99.853	99.608	99.559	99.657	99.853	99.559	99.608	99.608	99.559	99.853	99.559	99.853	99.363	99.853	99.853	99.853	99.657	99.657	99.755	99.461	99.657	99.853	99.657	99.657	99.853	99.853	99.755	99.657	99.853	99.853
89	U	CMC 1844	99.804	99.608	99.804	99.804	99.657	100	99.657	99.902	99.902	99.902	99.804	100	99.804	99.804	99.559	99.706	99.755	100	99.657	99.608	99.804	100	99.706	99.755	99.755	99.706	100	99.706	100	99.412	100	100	99.902	99.804	99.804	99.804	99.51	99.804	100	99.804	99.706	99.902	99.902	99.804	99.804	100	100
90	U	CMC 1845	99.804	99.657	99.608	99.608	99.853	99.804	99.853	99.706	99.902	99.706	99.804	99.804	99.608	99.608	99.755	99.829	99.755	99.804	99.78	99.804	99.608	99.804	99.706	99.755	99.755	99.706	99.804	99.706	99.804	99.608	99.804	99.804	99.902	99.608	99.608	99.804	99.706	99.608	99.804	99.804	99.829	99.902	99.902	99.804	99.608	99.804	99.804
91	U	CMC 1847	99.657	99.584	99.657	99.657	99.706	99.755	99.706	99.657	99.853	99.657	99.559	99.755	99.657	99.559	99.559	99.755	99.608	99.755	99.657	99.559	99.657	99.755	99.559	99.51	99.51	99.461	99.755	99.461	99.755	99.461	99.755	99.755	99.853	99.657	99.657	99.755	99.559	99.657	99.755	99.657	99.657	99.853	99.853	99.853	99.657	99.755	99.755
92	U	CMC 1848	99.535	99.657	99.608	99.608	99.584	99.608	99.584	99.706	99.706	99.706	99.731	99.608	99.608	99.608	99.682	99.633	99.584	99.608	99.78	99.535	99.608	99.608	99.633	99.584	99.682	99.633	99.608	99.633	99.608	99.535	99.608	99.608	99.706	99.608	99.608	99.804	99.633	99.608	99.608	99.535	99.829	99.706	99.706	99.608	99.608	99.608	99.608
93	U	CMC 1850	99.608	99.657	99.608	99.608	99.657	99.412	99.657	99.51	99.51	99.51	99.608	99.412	99.608	99.412	99.853	99.437	99.657	99.412	99.682	99.804	99.608	99.412	99.706	99.657	99.559	99.51	99.412	99.51	99.412	100	99.412	99.412	99.51	99.608	99.608	99.608	99.902	99.608	99.412	99.608	99.633	99.51	99.51	99.412	99.608	99.412	99.412
94	U	CMC 1852	99.804	99.804	100	100	99.657	99.804	99.657	99.902	99.706	99.902	99.804	99.804	100	99.804	99.657	99.51	99.853	99.804	99.755	99.412	100	99.804	99.902	99.657	99.755	99.706	99.804	99.706	99.804	99.608	99.804	99.804	99.706	100	100	99.804	99.706	100	99.804	99.804	99.706	99.706	99.706	99.608	100	99.804	99.804
95	U	CMC 1853	99.608	99.731	99.804	99.804	99.657	99.804	99.657	99.902	99.902	99.902	99.804	99.804	99.804	99.804	99.755	99.706	99.657	99.804	99.853	99.608	99.804	99.804	99.706	99.657	99.755	99.706	99.804	99.706	99.804	99.608	99.804	99.804	99.902	99.804	99.804	100	99.706	99.804	99.804	99.608	99.902	99.902	99.902	99.804	99.804	99.804	99.804
96	U	CMC 1854	99.608	99.535	99.608	99.608	99.657	99.804	99.657	99.706	99.902	99.706	99.608	99.804	99.608	99.608	99.559	99.902	99.559	99.804	99.657	99.608	99.608	99.804	99.51	99.559	99.559	99.51	99.804	99.51	99.804	99.412	99.804	99.804	99.902	99.608	99.608	99.804	99.51	99.608	99.804	99.608	99.706	99.902	99.902	100	99.608	99.804	99.804
97	U	CMC 1856	99.804	99.608	99.804	99.804	99.657	100	99.657	99.902	99.902	99.902	99.804	100	99.804	99.804	99.559	99.706	99.755	100	99.657	99.608	99.804	100	99.706	99.755	99.755	99.706	100	99.706	100	99.412	100	100	99.902	99.804	99.804	99.804	99.51	99.804	100	99.804	99.706	99.902	99.902	99.804	99.804	100	100
98	U	CMC 1858	99.804	99.608	99.804	99.804	99.657	100	99.657	99.902	99.902	99.902	99.804	100	99.804	99.804	99.559	99.706	99.755	100	99.657	99.608	99.804	100	99.706	99.755	99.755	99.706	100	99.706	100	99.412	100	100	99.902	99.804	99.804	99.804	99.51	99.804	100	99.804	99.706	99.902	99.902	99.804	99.804	100	100
99	U	CMC 1860	99.706	99.755	99.706	99.706	99.755	99.608	99.755	99.706	99.706	99.706	99.804	99.608	99.706	99.608	99.804	99.633	99.755	99.608	99.829	99.608	99.706	99.608	99.804	99.657	99.755	99.706	99.608	99.706	99.608	99.706	99.608	99.608	99.706	99.706	99.706	99.804	99.804	99.706	99.608	99.706	99.829	99.706	99.706	99.608	99.706	99.608	99.608
100	U	CMC 1862	99.804	99.804	100	100	99.657	99.804	99.657	99.902	99.706	99.902	99.804	99.804	100	99.804	99.657	99.51	99.853	99.804	99.755	99.412	100	99.804	99.902	99.657	99.755	99.706	99.804	99.706	99.804	99.608	99.804	99.804	99.706	100	100	99.804	99.706	100	99.804	99.804	99.706	99.706	99.706	99.608	100	99.804	99.804
101	U	CMC 1863	99.706	99.633	99.706	99.706	99.559	99.706	99.559	99.804	99.608	99.804	99.902	99.706	99.706	99.706	99.657	99.535	99.755	99.706	99.682	99.51	99.706	99.706	99.804	99.755	99.951	100	99.706	99.804	99.706	99.51	99.706	99.706	99.608	99.706	99.706	99.706	99.608	99.706	99.706	99.706	99.731	99.608	99.608	99.51	99.706	99.706	99.706
102	U	CMC 1866	99.706	99.559	99.51	99.51	99.755	99.706	99.755	99.608	99.804	99.608	99.706	99.706	99.51	99.51	99.657	99.731	99.657	99.706	99.682	99.706	99.51	99.706	99.608	99.657	99.657	99.608	99.706	99.608	99.706	99.51	99.706	99.706	99.804	99.51	99.51	99.706	99.608	99.51	99.706	99.706	99.731	99.804	99.804	99.706	99.51	99.706	99.706
103	U	CMC 1868	99.706	99.755	99.706	99.706	99.755	99.51	99.755	99.608	99.608	99.608	99.706	99.51	99.706	99.51	99.853	99.535	99.755	99.51	99.78	99.706	99.706	99.51	99.804	99.657	99.657	99.608	99.51	99.608	99.51	99.902	99.51	99.51	99.608	99.706	99.706	99.706	99.902	99.706	99.51	99.706	99.731	99.608	99.608	99.51	99.706	99.51	99.51
104	U	CMC 1869	99.828	99.829	99.902	99.902	99.682	99.706	99.682	99.804	99.608	99.804	99.828	99.706	99.902	99.706	99.682	99.535	99.877	99.706	99.78	99.437	99.902	99.706	99.926	99.681	99.779	99.73	99.706	99.73	99.706	99.633	99.706	99.706	99.608	99.902	99.902	99.706	99.731	99.902	99.706	99.828	99.731	99.608	99.608	99.51	99.902	99.706	99.706
105	U	CMC 1870	99.804	99.804	100	100	99.657	99.804	99.657	99.902	99.706	99.902	99.804	99.804	100	99.804	99.657	99.51	99.853	99.804	99.755	99.412	100	99.804	99.902	99.657	99.755	99.706	99.804	99.706	99.804	99.608	99.804	99.804	99.706	100	100	99.804	99.706	100	99.804	99.804	99.706	99.706	99.706	99.608	100	99.804	99.804
106	U	CMC 1871	99.804	99.608	99.804	99.804	99.657	100	99.657	99.902	99.902	99.902	99.804	100	99.804	99.804	99.559	99.706	99.755	100	99.657	99.608	99.804	100	99.706	99.755	99.755	99.706	100	99.706	100	99.412	100	100	99.902	99.804	99.804	99.804	99.51	99.804	100	99.804	99.706	99.902	99.902	99.804	99.804	100	100
107	U	CMC 1872	99.706	99.633	99.706	99.706	99.755	99.902	99.755	99.804	100	99.804	99.706	99.902	99.706	99.706	99.657	99.804	99.657	99.902	99.755	99.706	99.706	99.902	99.608	99.657	99.657	99.608	99.902	99.608	99.902	99.51	99.902	99.902	100	99.706	99.706	99.902	99.608	99.706	99.902	99.706	99.804	100	100	99.902	99.706	99.902	99.902
108	U	CMC 1873	99.706	99.633	99.706	99.706	99.559	99.706	99.559	99.804	99.608	99.804	99.902	99.706	99.706	99.902	99.657	99.535	99.755	99.706	99.682	99.51	99.706	99.706	99.804	99.755	99.853	99.804	99.706	100	99.706	99.51	99.706	99.706	99.608	99.706	99.706	99.706	99.608	99.706	99.706	99.706	99.731	99.608	99.608	99.51	99.706	99.706	99.706
109	U	CMC 1875	99.78	99.731	99.682	99.682	99.731	99.584	99.731	99.584	99.584	99.584	99.682	99.584	99.682	99.486	99.633	99.51	99.78	99.584	99.657	99.486	99.682	99.584	99.78	99.584	99.633	99.584	99.584	99.584	99.584	99.584	99.584	99.584	99.584	99.682	99.682	99.584	99.682	99.682	99.584	99.78	99.608	99.584	99.584	99.486	99.682	99.584	99.584
110	U	CMC 1876	99.804	99.804	100	100	99.657	99.804	99.657	99.902	99.706	99.902	99.804	99.804	100	99.804	99.657	99.51	99.853	99.804	99.755	99.412	100	99.804	99.902	99.657	99.755	99.706	99.804	99.706	99.804	99.608	99.804	99.804	99.706	100	100	99.804	99.706	100	99.804	99.804	99.706	99.706	99.706	99.608	100	99.804	99.804
111	U	CMC 1877	99.804	99.804	100	100	99.657	99.804	99.657	99.902	99.706	99.902	99.804	99.804	100	99.804	99.657	99.51	99.853	99.804	99.755	99.412	100	99.804	99.902	99.657	99.755	99.706	99.804	99.706	99.804	99.608	99.804	99.804	99.706	100	100	99.804	99.706	100	99.804	99.804	99.706	99.706	99.706	99.608	100	99.804	99.804
112	U	CMC 1879	99.902	99.633	99.706	99.706	99.755	99.706	99.755	99.608	99.608	99.608	99.706	99.706	99.706	99.51	99.657	99.535	99.853	99.706	99.584	99.706	99.706	99.706	99.804	99.853	99.657	99.608	99.706	99.608	99.706	99.706	99.706	99.706	99.608	99.706	99.706	99.51	99.706	99.706	99.706	99.902	99.535	99.608	99.608	99.51	99.706	99.706	99.706
113	U	CMC 1881	100	99.731	99.804	99.804	99.853	99.804	99.853	99.706	99.706	99.706	99.804	99.804	99.804	99.608	99.657	99.633	99.951	99.804	99.682	99.608	99.804	99.804	99.902	99.755	99.755	99.706	99.804	99.706	99.804	99.608	99.804	99.804	99.706	99.804	99.804	99.608	99.706	99.804	99.804	100	99.633	99.706	99.706	99.608	99.804	99.804	99.804
114	U	CMC 1885	99.706	99.633	99.706	99.706	99.559	99.706	99.559	99.804	99.608	99.804	99.902	99.706	99.706	99.706	99.657	99.535	99.755	99.706	99.682	99.51	99.706	99.706	99.804	99.755	99.951	100	99.706	99.804	99.706	99.51	99.706	99.706	99.608	99.706	99.706	99.706	99.608	99.706	99.706	99.706	99.731	99.608	99.608	99.51	99.706	99.706	99.706
115	U	CMC 1886	99.804	99.804	100	100	99.657	99.804	99.657	99.902	99.706	99.902	99.804	99.804	100	99.804	99.657	99.51	99.853	99.804	99.755	99.412	100	99.804	99.902	99.657	99.755	99.706	99.804	99.706	99.804	99.608	99.804	99.804	99.706	100	100	99.804	99.706	100	99.804	99.804	99.706	99.706	99.706	99.608	100	99.804	99.804
116	U	CMC 1887	99.706	99.633	99.706	99.706	99.559	99.706	99.559	99.804	99.608	99.804	99.902	99.706	99.706	99.706	99.657	99.535	99.755	99.706	99.682	99.51	99.706	99.706	99.804	99.755	99.951	100	99.706	99.804	99.706	99.51	99.706	99.706	99.608	99.706	99.706	99.706	99.608	99.706	99.706	99.706	99.731	99.608	99.608	99.51	99.706	99.706	99.706
117	U	CMC 1888	99.828	99.633	99.706	99.706	99.682	99.902	99.682	99.804	99.804	99.804	99.828	99.902	99.706	99.706	99.584	99.731	99.779	99.902	99.682	99.633	99.706	99.902	99.73	99.779	99.779	99.73	99.902	99.73	99.902	99.437	99.902	99.902	99.804	99.706	99.706	99.706	99.535	99.706	99.902	99.828	99.731	99.804	99.804	99.706	99.706	99.902	99.902
118	U	CMC 1889	99.706	99.755	99.706	99.706	99.755	99.51	99.755	99.608	99.608	99.608	99.706	99.51	99.706	99.51	99.853	99.535	99.755	99.51	99.78	99.706	99.706	99.51	99.804	99.657	99.657	99.608	99.51	99.608	99.51	99.902	99.51	99.51	99.608	99.706	99.706	99.706	99.902	99.706	99.51	99.706	99.731	99.608	99.608	99.51	99.706	99.51	99.51
119	U	CMC 1890	99.902	99.633	99.706	99.706	99.755	99.706	99.755	99.608	99.608	99.608	99.706	99.706	99.706	99.51	99.657	99.535	99.853	99.706	99.584	99.706	99.706	99.706	99.804	99.853	99.657	99.608	99.706	99.608	99.706	99.706	99.706	99.706	99.608	99.706	99.706	99.51	99.706	99.706	99.706	99.902	99.535	99.608	99.608	99.51	99.706	99.706	99.706
120	U	CMC 1891	99.755	99.682	99.755	99.755	99.608	99.657	99.608	99.755	99.559	99.755	99.853	99.657	99.755	99.657	99.657	99.486	99.804	99.657	99.682	99.461	99.755	99.657	99.853	99.706	99.902	99.951	99.657	99.755	99.657	99.559	99.657	99.657	99.559	99.755	99.755	99.657	99.657	99.755	99.657	99.755	99.682	99.559	99.559	99.461	99.755	99.657	99.657
121	U	CMC 1893	99.706	99.706	99.902	99.902	99.559	99.902	99.559	100	99.804	100	99.902	99.902	99.902	99.902	99.657	99.608	99.755	99.902	99.755	99.51	99.902	99.902	99.804	99.755	99.853	99.804	99.902	99.804	99.902	99.51	99.902	99.902	99.804	99.902	99.902	99.902	99.608	99.902	99.902	99.706	99.804	99.804	99.804	99.706	99.902	99.902	99.902
122	U	CMC 1896	100	99.731	99.804	99.804	99.853	99.804	99.853	99.706	99.706	99.706	99.804	99.804	99.804	99.608	99.657	99.633	99.951	99.804	99.682	99.608	99.804	99.804	99.902	99.755	99.755	99.706	99.804	99.706	99.804	99.608	99.804	99.804	99.706	99.804	99.804	99.608	99.706	99.804	99.804	100	99.633	99.706	99.706	99.608	99.804	99.804	99.804
123	U	CMC 1898	99.706	99.755	99.706	99.706	99.755	99.51	99.755	99.608	99.608	99.608	99.706	99.51	99.706	99.51	99.853	99.535	99.755	99.51	99.78	99.706	99.706	99.51	99.804	99.657	99.657	99.608	99.51	99.608	99.51	99.902	99.51	99.51	99.608	99.706	99.706	99.706	99.902	99.706	99.51	99.706	99.731	99.608	99.608	99.51	99.706	99.51	99.51
124	U	CMC 1900	99.804	99.608	99.804	99.804	99.657	100	99.657	99.902	99.902	99.902	99.804	100	99.804	99.804	99.559	99.706	99.755	100	99.657	99.608	99.804	100	99.706	99.755	99.755	99.706	100	99.706	100	99.412	100	100	99.902	99.804	99.804	99.804	99.51	99.804	100	99.804	99.706	99.902	99.902	99.804	99.804	100	100
125	U	CMC 1901	99.559	99.608	99.559	99.559	99.608	99.461	99.608	99.559	99.559	99.559	99.657	99.461	99.559	99.461	99.853	99.486	99.608	99.461	99.682	99.853	99.559	99.461	99.657	99.706	99.608	99.559	99.461	99.559	99.461	99.951	99.461	99.461	99.559	99.559	99.559	99.657	99.853	99.559	99.461	99.559	99.682	99.559	99.559	99.461	99.559	99.461	99.461
126	U	CMC 1903	99.706	99.633	99.706	99.706	99.559	99.706	99.559	99.804	99.608	99.804	99.902	99.706	99.706	99.706	99.657	99.535	99.755	99.706	99.682	99.51	99.706	99.706	99.804	99.755	99.951	100	99.706	99.804	99.706	99.51	99.706	99.706	99.608	99.706	99.706	99.706	99.608	99.706	99.706	99.706	99.731	99.608	99.608	99.51	99.706	99.706	99.706
127	U	CMC 1904	99.78	99.804	99.755	99.755	99.755	99.657	99.755	99.657	99.682	99.657	99.682	99.657	99.755	99.559	99.657	99.608	99.78	99.657	99.755	99.51	99.755	99.657	99.78	99.584	99.633	99.584	99.657	99.584	99.657	99.608	99.657	99.657	99.682	99.755	99.755	99.682	99.706	99.755	99.657	99.78	99.706	99.682	99.682	99.584	99.755	99.657	99.657
128	U	CMC 1905	99.706	99.755	99.706	99.706	99.755	99.608	99.755	99.706	99.706	99.706	99.804	99.608	99.706	99.608	99.804	99.633	99.755	99.608	99.829	99.608	99.706	99.608	99.804	99.657	99.755	99.706	99.608	99.706	99.608	99.706	99.608	99.608	99.706	99.706	99.706	99.804	99.804	99.706	99.608	99.706	99.829	99.706	99.706	99.608	99.706	99.608	99.608
129	U	CMC 1906	99.73	99.535	99.608	99.608	99.584	99.804	99.584	99.706	99.706	99.706	99.73	99.804	99.608	99.608	99.486	99.829	99.681	99.804	99.584	99.535	99.608	99.804	99.632	99.681	99.681	99.632	99.804	99.632	99.804	99.339	99.804	99.804	99.706	99.608	99.608	99.608	99.437	99.608	99.804	99.73	99.633	99.706	99.706	99.804	99.608	99.804	99.804
130	U	CMC 1907	99.902	99.633	99.706	99.706	99.755	99.706	99.755	99.608	99.608	99.608	99.706	99.706	99.706	99.51	99.657	99.535	99.853	99.706	99.584	99.706	99.706	99.706	99.804	99.853	99.657	99.608	99.706	99.608	99.706	99.706	99.706	99.706	99.608	99.706	99.706	99.51	99.706	99.706	99.706	99.902	99.535	99.608	99.608	99.51	99.706	99.706	99.706
131	U	CMC 1909	99.633	99.755	99.706	99.706	99.682	99.608	99.682	99.706	99.706	99.706	99.731	99.608	99.706	99.608	99.731	99.633	99.682	99.608	99.829	99.535	99.706	99.608	99.731	99.584	99.682	99.633	99.608	99.633	99.608	99.633	99.608	99.608	99.706	99.706	99.706	99.804	99.731	99.706	99.608	99.633	99.829	99.706	99.706	99.608	99.706	99.608	99.608
132	U	CMC 1910	99.657	99.706	99.657	99.657	99.706	99.559	99.706	99.657	99.657	99.657	99.755	99.559	99.657	99.559	99.853	99.584	99.706	99.559	99.78	99.755	99.657	99.559	99.755	99.706	99.706	99.657	99.559	99.657	99.559	99.853	99.559	99.559	99.657	99.657	99.657	99.755	99.853	99.657	99.559	99.657	99.78	99.657	99.657	99.559	99.657	99.559	99.559
133	U	CMC 1911	99.706	99.51	99.706	99.706	99.559	99.902	99.559	99.804	99.804	99.804	99.706	99.902	99.706	99.706	99.461	99.804	99.657	99.902	99.559	99.51	99.706	99.902	99.608	99.657	99.657	99.608	99.902	99.608	99.902	99.314	99.902	99.902	99.804	99.706	99.706	99.706	99.412	99.706	99.902	99.706	99.608	99.804	99.804	99.902	99.706	99.902	99.902
134	U	CMC 1913	99.608	99.731	99.804	99.804	99.657	99.804	99.657	99.902	99.902	99.902	99.804	99.804	99.804	99.804	99.755	99.706	99.657	99.804	99.853	99.608	99.804	99.804	99.706	99.657	99.755	99.706	99.804	99.706	99.804	99.608	99.804	99.804	99.902	99.804	99.804	100	99.706	99.804	99.804	99.608	99.902	99.902	99.902	99.804	99.804	99.804	99.804
135	U	CMC 1914	100	99.731	99.804	99.804	99.853	99.804	99.853	99.706	99.706	99.706	99.804	99.804	99.804	99.608	99.657	99.633	99.951	99.804	99.682	99.608	99.804	99.804	99.902	99.755	99.755	99.706	99.804	99.706	99.804	99.608	99.804	99.804	99.706	99.804	99.804	99.608	99.706	99.804	99.804	100	99.633	99.706	99.706	99.608	99.804	99.804	99.804
136	U	CMC 1915	99.804	99.804	100	100	99.657	99.804	99.657	99.902	99.706	99.902	99.804	99.804	100	99.804	99.657	99.51	99.853	99.804	99.755	99.412	100	99.804	99.902	99.657	99.755	99.706	99.804	99.706	99.804	99.608	99.804	99.804	99.706	100	100	99.804	99.706	100	99.804	99.804	99.706	99.706	99.706	99.608	100	99.804	99.804
137	U	CMC 1918	99.706	99.633	99.706	99.706	99.559	99.706	99.559	99.804	99.608	99.804	99.902	99.706	99.706	99.902	99.657	99.535	99.755	99.706	99.682	99.51	99.706	99.706	99.804	99.755	99.853	99.804	99.706	100	99.706	99.51	99.706	99.706	99.608	99.706	99.706	99.706	99.608	99.706	99.706	99.706	99.731	99.608	99.608	99.51	99.706	99.706	99.706
138	U	CMC 1919	99.706	99.706	99.902	99.902	99.559	99.706	99.559	99.804	99.608	99.804	99.706	99.706	99.902	99.902	99.559	99.412	99.755	99.706	99.657	99.314	99.902	99.706	99.804	99.559	99.657	99.608	99.706	99.804	99.706	99.51	99.706	99.706	99.608	99.902	99.902	99.706	99.608	99.902	99.706	99.706	99.608	99.608	99.608	99.51	99.902	99.706	99.706
139	U	CMC 1920	99.608	99.657	99.608	99.608	99.657	99.412	99.657	99.51	99.51	99.51	99.608	99.412	99.608	99.412	99.853	99.437	99.657	99.412	99.682	99.804	99.608	99.412	99.706	99.657	99.559	99.51	99.412	99.51	99.412	100	99.412	99.412	99.51	99.608	99.608	99.608	99.902	99.608	99.412	99.608	99.633	99.51	99.51	99.412	99.608	99.412	99.412
140	U	CMC 1921	99.804	99.804	100	100	99.657	99.804	99.657	99.902	99.706	99.902	99.804	99.804	100	99.804	99.657	99.51	99.853	99.804	99.755	99.412	100	99.804	99.902	99.657	99.755	99.706	99.804	99.706	99.804	99.608	99.804	99.804	99.706	100	100	99.804	99.706	100	99.804	99.804	99.706	99.706	99.706	99.608	100	99.804	99.804
141	U	CMC 1923	100	99.731	99.804	99.804	99.853	99.804	99.853	99.706	99.706	99.706	99.804	99.804	99.804	99.608	99.657	99.633	99.951	99.804	99.682	99.608	99.804	99.804	99.902	99.755	99.755	99.706	99.804	99.706	99.804	99.608	99.804	99.804	99.706	99.804	99.804	99.608	99.706	99.804	99.804	100	99.633	99.706	99.706	99.608	99.804	99.804	99.804
142	U	CMC 1925	99.633	99.755	99.706	99.706	99.682	99.706	99.682	99.804	99.804	99.804	99.829	99.706	99.706	99.706	99.78	99.731	99.682	99.706	99.878	99.633	99.706	99.706	99.731	99.682	99.78	99.731	99.706	99.731	99.706	99.633	99.706	99.706	99.804	99.706	99.706	99.902	99.731	99.706	99.706	99.633	99.927	99.804	99.804	99.706	99.706	99.706	99.706
143	U	CMC 1926	99.902	99.829	99.902	99.902	99.755	99.706	99.755	99.804	99.608	99.804	99.902	99.706	99.902	99.706	99.755	99.535	99.951	99.706	99.78	99.51	99.902	99.706	100	99.755	99.853	99.804	99.706	99.804	99.706	99.706	99.706	99.706	99.608	99.902	99.902	99.706	99.804	99.902	99.706	99.902	99.731	99.608	99.608	99.51	99.902	99.706	99.706
144	U	CMC 1927	99.706	99.633	99.706	99.706	99.755	99.902	99.755	99.804	100	99.804	99.706	99.902	99.706	99.706	99.657	99.804	99.657	99.902	99.755	99.706	99.706	99.902	99.608	99.657	99.657	99.608	99.902	99.608	99.902	99.51	99.902	99.902	100	99.706	99.706	99.902	99.608	99.706	99.902	99.706	99.804	100	100	99.902	99.706	99.902	99.902
145	U	CMC 1928	99.706	99.633	99.706	99.706	99.559	99.706	99.559	99.804	99.608	99.804	99.902	99.706	99.706	99.706	99.657	99.535	99.755	99.706	99.682	99.51	99.706	99.706	99.804	99.755	99.951	100	99.706	99.804	99.706	99.51	99.706	99.706	99.608	99.706	99.706	99.706	99.608	99.706	99.706	99.706	99.731	99.608	99.608	99.51	99.706	99.706	99.706
146	U	CMC 1931	99.608	99.535	99.608	99.608	99.657	99.804	99.657	99.706	99.902	99.706	99.608	99.804	99.608	99.608	99.559	99.902	99.559	99.804	99.657	99.608	99.608	99.804	99.51	99.559	99.559	99.51	99.804	99.51	99.804	99.412	99.804	99.804	99.902	99.608	99.608	99.804	99.51	99.608	99.804	99.608	99.706	99.902	99.902	100	99.608	99.804	99.804
147	U	CMC 1932	99.706	99.633	99.706	99.706	99.559	99.706	99.559	99.804	99.608	99.804	99.902	99.706	99.706	99.902	99.657	99.535	99.755	99.706	99.682	99.51	99.706	99.706	99.804	99.755	99.853	99.804	99.706	100	99.706	99.51	99.706	99.706	99.608	99.706	99.706	99.706	99.608	99.706	99.706	99.706	99.731	99.608	99.608	99.51	99.706	99.706	99.706
148	U	CMC 1936	99.804	99.804	100	100	99.657	99.804	99.657	99.902	99.706	99.902	99.804	99.804	100	99.804	99.657	99.51	99.853	99.804	99.755	99.412	100	99.804	99.902	99.657	99.755	99.706	99.804	99.706	99.804	99.608	99.804	99.804	99.706	100	100	99.804	99.706	100	99.804	99.804	99.706	99.706	99.706	99.608	100	99.804	99.804
149	U	CMC 1937	99.608	99.535	99.608	99.608	99.461	99.608	99.461	99.706	99.51	99.706	99.804	99.608	99.608	99.804	99.559	99.437	99.657	99.608	99.584	99.412	99.608	99.608	99.706	99.657	99.755	99.706	99.608	99.902	99.608	99.412	99.608	99.608	99.51	99.608	99.608	99.608	99.51	99.608	99.608	99.608	99.633	99.51	99.51	99.412	99.608	99.608	99.608
150	U	CMC 1940	99.682	99.804	99.755	99.755	99.731	99.657	99.731	99.755	99.755	99.755	99.78	99.657	99.755	99.657	99.78	99.682	99.731	99.657	99.878	99.584	99.755	99.657	99.78	99.633	99.731	99.682	99.657	99.682	99.657	99.682	99.657	99.657	99.755	99.755	99.755	99.853	99.78	99.755	99.657	99.682	99.878	99.755	99.755	99.657	99.755	99.657	99.657
151	U	CMC 1941	99.706	99.633	99.706	99.706	99.559	99.706	99.559	99.804	99.608	99.804	99.902	99.706	99.706	99.706	99.657	99.535	99.755	99.706	99.682	99.51	99.706	99.706	99.804	99.755	99.951	100	99.706	99.804	99.706	99.51	99.706	99.706	99.608	99.706	99.706	99.706	99.608	99.706	99.706	99.706	99.731	99.608	99.608	99.51	99.706	99.706	99.706
152	U	CMC 1942	99.804	99.804	100	100	99.657	99.804	99.657	99.902	99.706	99.902	99.804	99.804	100	99.804	99.657	99.51	99.853	99.804	99.755	99.412	100	99.804	99.902	99.657	99.755	99.706	99.804	99.706	99.804	99.608	99.804	99.804	99.706	100	100	99.804	99.706	100	99.804	99.804	99.706	99.706	99.706	99.608	100	99.804	99.804
153	U	CMC 1946	99.706	99.56	99.511	99.511	99.658	99.706	99.658	99.609	99.706	99.609	99.706	99.706	99.511	99.511	99.56	99.633	99.658	99.706	99.584	99.609	99.511	99.706	99.609	99.658	99.658	99.609	99.706	99.609	99.706	99.413	99.706	99.706	99.706	99.511	99.511	99.609	99.511	99.511	99.706	99.706	99.633	99.706	99.706	99.609	99.511	99.706	99.706
154	U	CMC 1952	99.608	99.608	99.804	99.804	99.461	99.804	99.461	99.902	99.706	99.902	99.804	99.804	99.804	100	99.559	99.51	99.657	99.804	99.657	99.412	99.804	99.804	99.706	99.657	99.755	99.706	99.804	99.902	99.804	99.412	99.804	99.804	99.706	99.804	99.804	99.804	99.51	99.804	99.804	99.608	99.706	99.706	99.706	99.608	99.804	99.804	99.804
155	U	CMC 1954	99.804	99.804	100	100	99.657	99.804	99.657	99.902	99.706	99.902	99.804	99.804	100	99.804	99.657	99.51	99.853	99.804	99.755	99.412	100	99.804	99.902	99.657	99.755	99.706	99.804	99.706	99.804	99.608	99.804	99.804	99.706	100	100	99.804	99.706	100	99.804	99.804	99.706	99.706	99.706	99.608	100	99.804	99.804
156	U	CMC 1957	99.804	99.608	99.804	99.804	99.657	100	99.657	99.902	99.902	99.902	99.804	100	99.804	99.804	99.559	99.706	99.755	100	99.657	99.608	99.804	100	99.706	99.755	99.755	99.706	100	99.706	100	99.412	100	100	99.902	99.804	99.804	99.804	99.51	99.804	100	99.804	99.706	99.902	99.902	99.804	99.804	100	100
157	U	CMC 1958	99.608	99.731	99.804	99.804	99.657	99.804	99.657	99.902	99.902	99.902	99.804	99.804	99.804	99.804	99.755	99.706	99.657	99.804	99.853	99.608	99.804	99.804	99.706	99.657	99.755	99.706	99.804	99.706	99.804	99.608	99.804	99.804	99.902	99.804	99.804	100	99.706	99.804	99.804	99.608	99.902	99.902	99.902	99.804	99.804	99.804	99.804
158	U	CMC 1959	99.706	99.706	99.902	99.902	99.559	99.902	99.559	100	99.804	100	99.902	99.902	99.902	99.902	99.657	99.608	99.755	99.902	99.755	99.51	99.902	99.902	99.804	99.755	99.853	99.804	99.902	99.804	99.902	99.51	99.902	99.902	99.804	99.902	99.902	99.902	99.608	99.902	99.902	99.706	99.804	99.804	99.804	99.706	99.902	99.902	99.902
159	U	CMC 1960	99.706	99.633	99.706	99.706	99.559	99.706	99.559	99.804	99.608	99.804	99.902	99.706	99.706	99.902	99.657	99.535	99.755	99.706	99.682	99.51	99.706	99.706	99.804	99.755	99.853	99.804	99.706	100	99.706	99.51	99.706	99.706	99.608	99.706	99.706	99.706	99.608	99.706	99.706	99.706	99.731	99.608	99.608	99.51	99.706	99.706	99.706
160	U	CMC 1962	99.706	99.657	99.608	99.608	99.755	99.608	99.755	99.608	99.706	99.608	99.706	99.608	99.608	99.51	99.755	99.731	99.706	99.608	99.731	99.706	99.608	99.608	99.706	99.608	99.657	99.608	99.608	99.608	99.608	99.706	99.608	99.608	99.706	99.608	99.608	99.706	99.755	99.608	99.608	99.706	99.731	99.706	99.706	99.706	99.608	99.608	99.608
161	U	CMC 1963	99.804	99.804	100	100	99.657	99.804	99.657	99.902	99.706	99.902	99.804	99.804	100	99.804	99.657	99.51	99.853	99.804	99.755	99.412	100	99.804	99.902	99.657	99.755	99.706	99.804	99.706	99.804	99.608	99.804	99.804	99.706	100	100	99.804	99.706	100	99.804	99.804	99.706	99.706	99.706	99.608	100	99.804	99.804
[truncated: 115 more columns]

[truncated: 6 more sheets: Table S11, Table S12, Table S13, Table S14, Table S15, Table S16]
